# Supplementary material
Source: publisher figshare collection journal article supplement (https://gsapubs.figshare.com/articles/dataset/_/15098277)
Supplement: Supplementary file 1 [file 1]

Baojin Wu, Genming Luo, Michael M. Joachimski, Paul B. Wignall, Lidan Lei, Junhua Huang, and Xulong Lai, 2021, Carbon and nitrogen isotope evidence for widespread presence of anoxic intermediate waters before and during the Permian-Triassic mass extinction: GSA Bulletin, <https://doi.org/10.1130/B36005.1>.

## Supplemental Material

**Table S1.** Geochemical data.
