# Supplementary material
Source: publisher figshare collection journal article supplement (https://gsapubs.figshare.com/articles/dataset/_/15098277)
Supplement: Supplementary file 1 [file 1]

## Sheet: Data of this study
Geochemical data reported in Wu et al.
Zhongli section
Sample No.	Depth#	Formation	Time Interval	δ13Ccarb	δ18Ocarb	δ13Corg	δ15N	δ13Ccarb-δ13Corg	TOC (ppm)	TN	C/N	Carbonate	TOC (×104ppm or %)	TN (ppm)
	(m)			(‰,VPDB)	(‰,VPDB)	(‰,VPDB	vs air ( ‰)	(‰,VPDB)		(ppm)		content (%)	acid-residues	acid-residues
ZL16-I-43	13.5	Luolou	Post-extinction	0.598275	-7.03888	-29	1	29.6	1246	42	29	93.6	1.9469	656
ZL16-I-42	12.9	Luolou	Post-extinction	0.661496	-7.03647	-29	1.2	29.7	1024	63	16	94.8	1.9692	1212
ZL16-I-41	11.9	Luolou	Post-extinction	0.615701	-6.66686	-29	1.2	29.6	451	83	5	93.48	0.6917	1273
ZL16-I-40	10.9	Luolou	Post-extinction	0.625428	-6.72765	-28.9	0.3	29.5	343	35	10	97.46	1.3504	1378
ZL16-I-39	9.9	Luolou	Post-extinction	1.14537	-5.34388	-29.1	0.1	30.2	227	17	13	98.85	1.9739	1478
ZL16-I-38	9.1	Luolou	Post-extinction	0.981041	-5.73258	-29.2	0.7	30.2	818	9	95	98.74	6.4921	714
ZL16-I-37	7.9	Luolou	Post-extinction	0.973544	-7.63172	-29	1	30	3792	62	61	94.88	7.4063	1211
ZL16-I-36	6.9	Luolou	Post-extinction	0.555723	-7.22194	-28.9	1	29.5	248	51	5	96.86	0.7898	1624
ZL16-I-35	5.9	Luolou	Post-extinction	1.14416	-6.7977	-28.9	0.7	30	1078	73	15	93.61	1.687	1142
ZL16-I-34	4.9	Luolou	Post-extinction	1.09613	-6.431	-28.9	1.1
ZL16-I-33	4.4	Luolou	Post-extinction			-29.1	0.7
ZL16-I-32	2.1	Luolou	Post-extinction	1.06918	-7.15038	-28.9	0.1	30	773	79	10	96.03	1.9471	1990
ZL16-I-31	1.9	Luolou	Post-extinction	1.28813	-7.45278	-28.7	-0.5	30	2297	97	24	91.83	2.8115	1187
ZL16-I-30	1.7	Luolou	Post-extinction	1.3966	-6.20647	-28.4	0.8	29.8	1971	46	43	94.95	3.903	911
ZL16-I-27	0.5	Luolou	Post-extinction	1.6541	-5.5693	-28.2	0.2	29.9	213	16	14	98.72	1.6641	1250
ZL16-I-26	0.3	Luolou	Post-extinction	-0.459405	-8.3733	-29.1	0.2	28.6	2073	57	36	96.49	5.906	1624
ZL16-I-25	-0.1	Wujiaping	Pre-extinction	1.66708	-7.54189	-26.1	1.4	27.8	572	23	25	98.78	4.6885	1885
ZL16-I-24	-0.3	Wujiaping	Pre-extinction	2.33373	-6.2018	-26.6	1.4	28.9	694	10	70	98.76	5.5968	806
ZL16-I-23	-0.6	Wujiaping	Pre-extinction	2.15389	-8.05056	-28.2	1.9	30.4	4191	37	112	95.75	9.8612	871
ZL16-I-22	-0.8	Wujiaping	Pre-extinction	2.49593	-5.85084	-26.5	2.2	29	507	9	54	98.91	4.6514	826
ZL16-I-21	-1.1	Wujiaping	Pre-extinction	2.67152	-5.85571	-26.6	2.1	29.3	551	11	52	99.61	14.1282	2821
ZL16-I-20	-1.2	Wujiaping	Pre-extinction	3.03465	-7.67707	-27.3	1.8	30.3
ZL16-I-19	-1.3	Wujiaping	Pre-extinction			-25.8	2		363	9	42	98.73	2.8583	709
ZL16-I-16	-2.6	Wujiaping	Pre-extinction	3.03992	-8.89862	-25.8	1.6	28.8	171	5	32	99.63	4.6216	1351
ZL16-I-15	-3.1	Wujiaping	Pre-extinction	3.20192	-5.93609	-27.8	1.2	31	1820	147	12	94.7	3.434	2774
ZL16-I-14	-3.5	Wujiaping	Pre-extinction	3.11798	-4.65974	-24.9		28	319			96.62	0.9438
ZL16-I-13	-3.9	Wujiaping	Pre-extinction	3.10399	-4.98614	-26.8	3.3	29.9	383	10	40	99.33	5.7164	1493
ZL16-I-12	-4.3	Wujiaping	Pre-extinction	3.34345	-5.81167	-26.2		29.5	394			99.42	6.7931
ZL16-I-10	-4.5	Wujiaping	Pre-extinction	3.07216	-7.37158	-25.8	3.3	28.9	113	5	23	99.7	3.7667	1667
ZL16-I-11	-4.6	Wujiaping	Pre-extinction	3.28972	-6.02358	-26.3	3.4	29.6	435	10	43	99.23	5.6494	1299
ZL16-I-9	-4.8	Wujiaping	Pre-extinction	3.85195	-5.65293	-27	3.1	30.9	809	10	79	99.78	36.7727	4545
ZL16-I-8	-5.1	Wujiaping	Pre-extinction	3.28728	-6.9983	-25.3	1.8	28.6	219	6	38	99.53	4.6596	1277
ZL16-I-7	-5.6	Wujiaping	Pre-extinction	3.04236	-6.92218	-27.4	1.6	30.4	949	8	120	99.56	2.15682	1818
ZL16-I-6	-6.1	Wujiaping	Pre-extinction	3.17475	-5.99049	-25.4	2.1	28.6	454	23	20	98.03	2.3046	1168
ZL16-I-5	-6.6	Wujiaping	Pre-extinction	2.3	-7.3	-25.7
ZL16-I-4	-7.1	Wujiaping	Pre-extinction	3.47382	-6.35221	-26.1	1.9	29.6	336	7	48	98.91	3.0826	642
ZL16-I-3	-8.1	Wujiaping	Pre-extinction	3.13826	-5.36145	-24.9	1.5	28	351	8	44	97.98	1.7376	396
ZL16-I-2	-8.6	Wujiaping	Pre-extinction	3.35662	-5.24737	-26.2	4.9	29.6	405	10	40	98.91	3.7156	917
ZL16-I-1	-9.1	Wujiaping	Pre-extinction	3.35399	-6.80283	-24.1		27.5	267			97.34	1.0038
#: +/- means above/below the lithological boundary
Jianshi section
Sample No.	Depth#	Formation	Conodont zone	Time Interval	δ13Ccarb	δ18Ocarb	δ13Corg	δ15N	δ13Ccarb-δ13Corg	TOC	TN (ppm)	C/N	Carbonate
	(m)				(‰,VPDB)	(‰,VPDB)	(‰,VPDB)	vs air ( ‰)	(‰,VPDB)	(%)			content (%)
JS-T-152-1	5.75	Daye	C. planata?	Post-extinction	-2.008	-6.982		-0.2		0.1	872	1	48.73
JS-T-152-2	5.35	Daye	C. planata?	Post-extinction	-0.705	-5.032	-23		22.3
JS-T-152-3	4.85	Daye	C. planata?	Post-extinction	-2.812	-7.283	-26		23.2
JS-T-151-1	4.75	Daye	C. planata	Post-extinction	-1.19	-6.845	-23		21.8
JS-T-151-2	4.55	Daye	C. planata	Post-extinction	-0.852	-3.773	-22.1		21.2
JS-T-151-3	4.3	Daye	C. planata	Post-extinction	-0.799	-5.206	-22.4		21.6
JS-T-150-1	4.15	Daye	C. planata	Post-extinction	-0.653	-5.34	-22.7	-0.4	22	0.2	1373	2	23.7
JS-T-150-2	3.95	Daye	C. planata	Post-extinction	-0.745	-4.872	-26.3		25.6
JS-T-149-1	3.75	Daye	C. planata	Post-extinction	-0.954	-3.844	-23.6		22.6
JS-T-149-2	3.25	Daye	C. planata	Post-extinction	-0.858	-4.532	-24.3		23.4
JS-T-148-1	3.15	Daye	C. planata	Post-extinction	-0.758	-5.479	-20.8		20
JS-T-148-2	2.95	Daye	C. planata	Post-extinction	-0.898	-4.931	-20.8	-0.2	19.9	0.2	1444	1	23.49
JS-T-146	2.51	Daye	C. planata	Post-extinction	-0.178	-6.385
JS-T-145-1	2.35	Daye	H. parvus	Post-extinction	-0.785	-4.593	-23.3		22.5
JS-T-145-2	2.15	Daye	H. parvus	Post-extinction	-0.828	-4.653	-20.5		19.7
JS-T-143-1	2.13	Daye	H. parvus	Post-extinction	-0.983	-4.041	-23.8		22.8
JS-T-143-2	1.93	Daye	H. parvus	Post-extinction	-0.943	-3.989	-24.9		24
JS-T-142-1	1.88	Daye	H. parvus	Post-extinction	-0.595	-5.374	-23.1		22.5
JS-T-142-2	1.68	Daye	H. parvus	Post-extinction	-1.119	-3.78
ˊJS-142	1.67	Daye	H. parvus	Post-extinction	-0.857	-3.504	-25.4	-0.5	24.5	0.1	1621	1	23.98
JS-T-142-3	1.58	Daye	H. parvus	Post-extinction	-0.88	-4.218	-23.3		22.4
JS-T-141	1.43	Daye	H. parvus	Post-extinction	-1.14	-3.95
ˊJS-141	1.42	Daye	H. parvus	Post-extinction	-0.762	-3.662	-24.7	-0.4	23.9
ˊJS-140	1.4	Daye	H. parvus	Post-extinction	-0.591	-3.779	-25.6	-0.4	25
JS-T-140	1.38	Daye	H. parvus	Post-extinction				-0.2		0.1	735	1	18.97
JS-T-139-1	1.31	Daye	H. parvus	Post-extinction	-0.574	-4.545	-22.3		21.7
JS-T-139-2	1.16	Daye	H. parvus	Post-extinction	-0.731	-3.892	-22.6		21.9
JS-T-139-3	1.01	Daye	H. parvus	Post-extinction	-0.017	-7.122	-26.8		26.8
JS-T-139-4	0.91	Daye	H. parvus	Post-extinction	-0.952	-3.015	-22		21
JS-T-139-5	0.86	Daye	H. parvus	Post-extinction			-26.3	-0.1	26.3	0.1	422	3	47.47
JS-T-139-6	0.81	Daye	H. parvus	Post-extinction	-0.679	-3.534	-25.2	-0.6	24.5	0.2	808	2	64.82
JS-T-139-7	0.76	Daye	H. parvus	Post-extinction	-0.81	-3.273	-24.6	-0.1	23.8	0.2	1122	2	52.47
JS-T-139-8	0.71	Daye	H. parvus	Post-extinction	-0.983	-3.042	-23.4	-0.3	22.4	0.1	7961	1	37.67
JS-T-138-1	0.56	Daye	H. parvus	Post-extinction	-1.043	-2.772	-21.8		20.8
ˊJS-138	0.53	Daye	H. parvus	Post-extinction	-0.881	-3.377	-25.3	-0.3	24.4				49.39
JS-T-137	0.46	Daye	H. parvus	Post-extinction	-0.755	-3.296
JS-T-136	0.41	Daye	H. parvus	Post-extinction	-0.735	-3.332
ˊJS-135	0.15	Daye	H. changxingensis	Post-extinction			-28.6	-0.4	28.6
JS-133	0.02	Daye	C. meishanensis	Post-extinction				-0.4
ˊJS-132-9	0	Daye	C. meishanensis	Post-extinction	0.592	-7.179	-26.1		26.7
JS-P-132-1	-0.03	Dalong	C. meishanensis	Post-extinction	0.618	-7.258	-26.2	0.5	26.8	0.7	968	7	19.36
JS-P-132-2	-0.07	Dalong	C. meishanensis	Post-extinction	0.985	-7.434	-25.4	-0.2	26.4	0.6	951	7	32.06
ˊJS-132-8	-0.1	Dalong	C. meishanensis	Post-extinction	1.329	-7.43	-26.3	0.2	27.6
JS-P-132-3	-0.13	Dalong	C. meishanensis	Post-extinction	0.986	-7.234	-26.4	0.2	27.4	0.5	1027	5	31.55
ˊJS-132-7	-0.15	Dalong	C. meishanensis	Post-extinction	0.658	-7.2	-26.9	0.3	27.6
ˊJS-132-6	-0.18	Dalong	C. meishanensis	Post-extinction	0.602	-7.158	-26.6	0.1	27.2
ˊJS-132-4	-0.2	Dalong	C. meishanensis	Post-extinction	0.819	-7.386	-26.5	0.1	27.3
ˊJS-132-3	-0.23	Dalong	C. meishanensis	Post-extinction	1.191	-7.261	-26.5	0.1	27.7
ˊJS-132-2	-0.3	Dalong	C. meishanensis	Post-extinction	0.514	-7.107	-25.9	-0.2	26.4
ˊJS-132-1	-0.35	Dalong	C. meishanensis	Post-extinction	0.324	-6.814	-26.6	0	26.9
JS-P-131-1	-0.36	Dalong	C. meishanensis	Post-extinction	0.891	-7.22	-26.3	0	27.2	0.7	1329	5	28.49
JS-P-131-2	-0.45	Dalong	C. meishanensis	Post-extinction	0.473	-7.157	-26.1	-0.1	26.6	0.5	1001	5	11.42
ˊJS-131-3	-0.48	Dalong	C. meishanensis	Post-extinction	0.991	-7.47	-26.7	0	27.7
ˊJS-131-2	-0.5	Dalong	C. meishanensis	Post-extinction	0.754	-7.157	-26.2	-0.2	27
ˊJS-131-1	-0.55	Dalong	C. meishanensis	Post-extinction	-1.882	-9.558	-27	-0.2	25.1
JS-P-127-1	-0.77	Dalong	C. yini	Pre-extinction	1.212	-7.396	-26.4	0.1	27.6	0.6	927	7	28.66
ˊJS-127-F	-0.94	Dalong	C. yini	Pre-extinction	0.83	-7.455	-26.9	0.2	27.7				32.07
JS-127-M	-0.99	Dalong	C. yini	Pre-extinction	1.07	-7.335
JS-127-D	-1.04	Dalong	C. yini	Pre-extinction	1.115	-7.283
JS-P-127-1	-0.76	Dalong	C. yini	Pre-extinction	0.898	-7.346
JS-P-126-1	-1.06	Dalong	C. yini	Pre-extinction	0.952	-7.131	-25	0.1	26				22.62
ˊJS-126	-1.11	Dalong	C. yini	Pre-extinction	0.898	-7.446	-26.2		27.1
JS-P-125-1	-1.2	Dalong	C. yini	Pre-extinction	1.417	-7.426	-25		26.4
JS-P-125-2	-1.44	Dalong	C. yini	Pre-extinction	1.002	-6.943	-26.3		27.3
JS-P-125-3	-1.64	Dalong	C. yini	Pre-extinction	1.027	-7.176	-25.2		26.2
JS-P-125-4	-1.71	Dalong	C. yini	Pre-extinction			-24.8	0.4		0.4	807	4	11.91
JS-P-125-5	-1.74	Dalong	C. yini	Pre-extinction			-25.2	0.4		0.7	1801	4	37.91
JS-P-124	-2.19	Dalong	C. yini	Pre-extinction	0.611	-6.809	-25.1	-0.1	25.7				30.18
ˊJS-124	-2.2	Dalong	C. yini	Pre-extinction	1.218	-7.342	-25.5		26.7				14.22
JS-P-123	-2.22	Dalong	C. yini	Pre-extinction	1.123	-7.24	-26.3	0.3	27.4	0.4	942	4	27.56
ˊJS-123	-2.26	Dalong	C. yini	Pre-extinction	-1.214	-7.394	-25.6		24.4
JS-P-122D	-2.5	Dalong	C. yini	Pre-extinction	1.551	-7.305	-25.2		26.8
JS-P-121-1	-2.75	Dalong	C. yini	Pre-extinction	0.461	-6.667	-25.3		25.8
ˊJS-121	-2.82	Dalong	C. yini	Pre-extinction	1.306	-7.468	-25.5		26.8
JS-P-120-U	-2.9	Dalong	C. yini	Pre-extinction	1.282	-7.13
JS-P-120D	-3.1	Dalong	C. yini	Pre-extinction	0.933	-6.58	-25.2		26.1
ˊJS-119	-3.33	Dalong	C. changxingensis	Pre-extinction	1.992	-6.263	-25.2		27.2
JS-P-119-2	-3.43	Dalong	C. changxingensis	Pre-extinction	-0.441	-7.24	-25		24.6
JS-P-118-1	-3.63	Dalong	C. changxingensis	Pre-extinction	1.048	-7.25	-24.5		25.5
JS-P-118-2	-3.73	Dalong	C. changxingensis	Pre-extinction	-0.024	-7.2	-25.5		25.5
ˊJS-118	-3.9	Dalong	C. changxingensis	Pre-extinction	-1.158	-7.374	-25.6		24.4
JS-P-118-5	-4.38	Dalong	C. changxingensis	Pre-extinction	0.52	-7.141		-0.3
JS-P-118-6	-4.48	Dalong	C. changxingensis	Pre-extinction	1.425	-7.186	-24.4		25.8
JS-P-118-8	-4.83	Dalong	C. changxingensis	Pre-extinction	1.651	-7.151	-25.2		26.9
ˊJS-117	-4.89	Dalong	C. changxingensis	Pre-extinction	-0.243	-7.172	-25.3		25.1
JS-P-117-2	-4.95	Dalong	C. changxingensis	Pre-extinction			-25.6
JS-P-116-1	-5.15	Dalong	C. changxingensis	Pre-extinction	1.552	-7.354	-24.3		25.9
JS-P-116-2	-5.35	Dalong	C. changxingensis	Pre-extinction	1.649	-7.356	-25.2	0.4	26.8	0.6	1280	5	24.7
JS-P-116-3	-5.6	Dalong	C. changxingensis	Pre-extinction	1.715	-7.316
ˊJS-116	-5.65	Dalong	C. changxingensis	Pre-extinction	1.222	-7.101	-25.6		26.8
JS-P-116-4	-5.75	Dalong	C. changxingensis	Pre-extinction			-25.3
JS-P-116-5	-6.1	Dalong	C. changxingensis	Pre-extinction	1.498	-7.081
ˊJS-115	-6.11	Dalong	C. changxingensis	Pre-extinction	-1.472	-7.227	-25.7		24.2
JS-P-115-2	-6.17	Dalong	C. changxingensis	Pre-extinction	-1.609	-7.21	-25.5		23.9
JS-P-114U	-6.37	Dalong	C. changxingensis	Pre-extinction	1.423	-6.983	-25.7		27.1
JS-P-114D	-6.57	Dalong	C. changxingensis	Pre-extinction	0.946	-6.985	-26.3		27.2
ˊJS-113	-6.66	Dalong	C. changxingensis	Pre-extinction	-1.848	-7.394	-24.7		22.9
JS-P-113-2	-6.79	Dalong	C. changxingensis	Pre-extinction	-1.602	-7.197	-25.8		24.2
JS-P-112U	-6.79	Dalong	C. changxingensis	Pre-extinction			-25.3	0.4		0.4	949	4	27.01
ˊJS-112	-6.99	Dalong	C. changxingensis	Pre-extinction	-1.581	-6.887	-26						29.58
JS-P-112D	-7.29	Dalong	C. changxingensis	Pre-extinction	1.45	-7.111		0.1		0.6	1709	3	22.34
JS-P-111-1	-7.44	Dalong	C. changxingensis	Pre-extinction	-0.967	-7.092	-25.8		24.8
ˊJS-111	-7.47	Dalong	C. changxingensis	Pre-extinction	-1.491	-7.146	-25.7		24.2
JS-P-110-1	-7.61	Dalong	C. changxingensis	Pre-extinction	-1.051	-7.038	-25.6		24.5
JS-P-110-2	-7.91	Dalong	C. changxingensis	Pre-extinction	1.308	-7.134	-24.8		26.1
JS-P-110-3	-8.11	Dalong	C. changxingensis	Pre-extinction			-25.1
JS-P-110-4	-8.31	Dalong	C. changxingensis	Pre-extinction	1.287	-7.252	-25.2		26.5
ˊJS-110	-8.45	Dalong	C. changxingensis	Pre-extinction	-1.252	-7.434	-25.4		24.1
JS-P-110-5	-8.61	Dalong	C. changxingensis	Pre-extinction	1.125	-6.392		0		0.3	1267	2	39.67
JS-P-110-6	-8.91	Dalong	C. changxingensis	Pre-extinction	1.36	-7.169	-24.7		26.1
JS-P-110-7’	-9.11	Dalong	C. changxingensis	Pre-extinction			-25.9
JS-P-110-7	-9.15	Dalong	C. changxingensis	Pre-extinction			-24.6
JS-P-110-8	-9.26	Dalong	C. changxingensis	Pre-extinction	1.202	-6.055	-25.8	0.1	27	0.3	1258	3	42.82
JS-P-109-1	-9.46	Dalong	C. changxingensis	Pre-extinction	1.083	-5.724	-24
JS-P-109-3	-9.86	Dalong	C. changxingensis	Pre-extinction				0.1		0.5	1440	3	24.23
JS-P-109-4	-10.26	Dalong	C. changxingensis	Pre-extinction	1.009	-7.054
JS-P-109-5	-10.46	Dalong	C. changxingensis	Pre-extinction	1.307	-6.874
JS-P-109-6	-10.66	Dalong	C. changxingensis	Pre-extinction	1.156	-7.384
#: +/- means above/below the lithological boundary
Ganxi section
Sample No.	Depth#	Formation	Conodont zone	Time Interval	δ13Ccarb	δ18Ocarb	δ13Corg	δ15N	δ13Ccarb-δ13Corg	TOC	TN (ppm)	C/N	Carbonate
	(m)				(‰,VPDB)	(‰,VPDB)	(‰,VPDB)	vs air ( ‰)	(‰,VPDB)	(%)			content (%)
GX256-7	9.07	Daye	H. postparvus	Post-extinction	-0.7795	-8.6432	-26.22		25.4
GX256-5	8.84	Daye	H. postparvus	Post-extinction	-0.43	-9.1174	-27.122		26.7
GX256-3-1	8.59	Daye	H. postparvus	Post-extinction	-0.3528	-5.1675	-25.711		25.4
GX255-5	7.75	Daye	H. postparvus	Post-extinction	-0.91	-8.1	-26.668		25.8
GX255-4	7.62	Daye	H. postparvus	Post-extinction	-0.6934	-6.7133	-24.959		24.3
GX255-2	7.37	Daye	H. postparvus	Post-extinction	-0.7608	-5.0597	-26.416		25.7
GX254-1	6.62	Daye	H. parvus	Post-extinction	-1.3162	-8.1097	-24.636		23.3
GX253-9	6.49	Daye	Barren	Post-extinction	-3.28	-8.27	-25.1594	-0.2	21.9
GX253-7	6.26	Daye	Barren	Post-extinction	-2.1419	-5.9684	-25.87		23.7
GX253-1	5.65	Daye	Barren	Post-extinction	-0.9062	-7.3617	-27.48		26.6
GX252-4	5.6	Daye	Barren	Post-extinction	-0.62	-6.01	-25.243		24.6
GX252-2	5.45	Daye	Barren	Post-extinction	-0.9828	-7.6887	-25.067	-0.4	24.1
GX250-1	4.55	Daye	Barren	Post-extinction	-0.5398	-5.5564	-24.104		23.6
GX249-7	4.39	Daye	Barren	Post-extinction	-0.9144	-6.474	-25.28		24.4
GX249-6	4.27	Daye	Barren	Post-extinction	-0.5932	-6.6713	-23.149		22.6
GX249-4	4.13	Daye	Barren	Post-extinction	-0.6601	-10.8794	-24.756		24.1
GX249-2	3.92	Daye	Barren	Post-extinction	-0.5615	-7.2547	-24.244	0.2	23.7
GX249-1	3.78	Daye	Barren	Post-extinction	-0.5814	-8.2413	-26.029		25.4
GX248-2	3.62	Daye	Barren	Post-extinction	-0.6652	-4.3194	-25.695		25
GX248-1	3.44	Daye	Barren	Post-extinction	-0.5595	-5.3613	-25.183		24.6
GX247-1	3.33	Daye	Barren	Post-extinction	-0.6457	-4.6726	-24.8		24.2	0.3			21.67
GX246-5	3.24	Daye	Barren	Post-extinction	-0.59	-4.67	-24.561		24	0.3			25.83
GX246-4	3.12	Daye	Barren	Post-extinction	-0.55	-4.56	-26.015	-0.3	25.5		1203	2
GX246-1	2.81	Daye	Barren	Post-extinction	-0.6614	-4.1734	-24.904		24.2
GX245-5	2.65	Daye	Barren	Post-extinction				-0.3
GX245-3	2.52	Daye	Barren	Post-extinction	-0.6247	-3.81	-25.782		25.2	0.1			55
GX245-2	2.45	Daye	Barren	Post-extinction	0.55	-6.83	-27.27	-0.2	27.8		766	2
GX245-1	2.39	Daye	Barren	Post-extinction	0.5933	-6.8362	-28.179		28.8
GX244	2.29	Daye	Barren	Post-extinction	0.4886	-6.8041	-26.39	-0.3	26.9
GX243-3	2.18	Daye	Barren	Post-extinction	0.4886	-6.8041	-26.39	-0.3	26.9				55.83
GX242-5	1.95	Daye	Barren	Post-extinction	-0.112	-5.2776	-27.644		27.5
GX242-3	1.84	Daye	Barren	Post-extinction	-0.4171	-4.1491	-27.121	-0.3	26.7		1429	4
GX242-2	1.78	Daye	Barren	Post-extinction	-0.0003	-5.0731	-26.923	-0.1	26.9		1250	4
GX242-1	1.73	Daye	Barren	Post-extinction	0.4757	-6.5326	-27.99		28.5	0.5			10.83
GX240-6	1.49	Daye	Barren	Post-extinction				-0.3		0.2	1022	2	35.83
GX240-3-2	1.29	Daye	Barren	Post-extinction	-0.1128	-6.5022	-26.487	-0.2	26.4	0.2	1083	2	36.67
GX240-1	1.18	Daye	Barren	Post-extinction	0.5738	-4.6736	-27.249	-0.2	27.8
GX239-8	1.14	Daye	Barren	Post-extinction	0.9108	-4.5522	-27.582	-0.3	28.5	0.3	1607	2	10.83
GX239-7	1.1	Daye	Barren	Post-extinction	1.2601	-3.8654	-27.591	-0.2	28.9	0.4	1579	3	10
GX239-6	1.06	Daye	Barren	Post-extinction	0.214	-3.9458	-26.227	-0.5	26.4	0.3	1245	3	15.83
GX-239-5	1.02	Daye	Barren	Post-extinction						0.3			10
GX239-4	0.96	Daye	Barren	Post-extinction	0.66	-6.42	-26.008	-0.4	26.7	0.3	1330	3	4.17
GX-239-3	0.81	Daye	Barren	Post-extinction						0.2			30
GX-239-2	0.76	Daye	Barren	Post-extinction						0.2			35
GX239-1	0.61	Daye	Barren	Post-extinction				-0.2		0.3	1518	2	11.67
GX-237-2顶	0.49	Daye	Barren	Post-extinction	0.9557	-8.0691	-27.51		28.5	0.2			26.67
GX237-16	0.49	Daye	Barren	Post-extinction	1.0868	-5.6526	-26.856	-0.2	27.9	0.5	616	9
GX237-15	0.48	Daye	Barren	Post-extinction	1.2203	-7.9524	-26.813	-0.2	28
GX237-14	0.46	Daye	Barren	Post-extinction	1.199	-7.9476	-26.773		28
GX237-13	0.45	Daye	Barren	Post-extinction	-0.7344	-7.391	-26.606	-0.1	25.9	0.4	305	14
GX237-12	0.43	Daye	C. meishanensis	Post-extinction	-1.33	-7.7	-26.5534		25.2
GX237-11	0.42	Daye	C. meishanensis	Post-extinction	-1.3137	-7.5173	-27.029	0.2	25.7
GX237-10	0.4	Daye	C. meishanensis	Post-extinction	-0.0967	-7.533	-27.0214		26.9	0.3
GX237-9	0.39	Daye	C. meishanensis	Post-extinction	1.0535	-8.3716	-27.053	0.1	28.1	0.4
GX237-8	0.37	Daye	C. meishanensis	Post-extinction	0.9745	-7.8444	-27.102		28.1	0.5
GX237-7	0.36	Daye	C. meishanensis	Post-extinction	1.13	-5.7019	-27.269		28.4
GX237-6	0.34	Daye	C. meishanensis	Post-extinction	1.245	-6.9484	-27.409		28.7
GX237-5	0.33	Daye	C. meishanensis	Post-extinction	1.0462	-6.3713	-27.459	-0.2	28.5
GX237-4	0.31	Daye	C. meishanensis	Post-extinction	1.2052	-7.5813	-27.181		28.4	0.6
GX237-3	0.3	Daye	C. meishanensis	Post-extinction	0.7896	-9.0697	-27.331		28.1
GX237-2	0.28	Daye	C. meishanensis	Post-extinction	0.9557	-8.0691	-27.51		28.5
GX237-1	0.27	Daye	C. meishanensis	Post-extinction	0.31	-8.43	-27.57		27.9				43.33
GX235	0.18	Daye	C. meishanensis	Post-extinction	0.8538	-6.0585	-25.6604	-0.2	26.5	0.5	1223	4	14.17
GX233-2	0.07	Dalong	C. yini	Pre-extinction	0.843	-7.8947	-25.9964	0.3	26.8	1.4	841	20	22.5
GX233-1	-0.05	Dalong	C. yini	Pre-extinction	-0.3256	-7.8058	-26.7274	0.8	26.4		905	18
GX232-2	-0.16	Dalong	C. yini	Pre-extinction	0.3154	-5.7259	-26.6244	0.3	26.9		262	63
GX232-1	-0.26	Dalong	C. yini	Pre-extinction	0.6304	-7.6774	-27.2794	0.6	27.9	0.3	429	9	60.83
GX231	-0.41	Dalong	C. yini	Pre-extinction	0.1399	-7.4516	-28.4234	0	28.6	4.2	2052	24	6.67
GX230U	-0.55	Dalong	C. yini	Pre-extinction	1.202	-6.9199	-26.9324	0.5	28.1		390	22
GX230M	-0.63	Dalong	C. yini	Pre-extinction	0.8308	-7.146	-27.5694	0.8	28.4	0.7			40.83
GX230D	-0.71	Dalong	C. yini	Pre-extinction	0.5879	-6.4976	-26.8534	-0.2	27.4		466	18
GX229-4	-0.79	Dalong	C. yini	Pre-extinction	1.0525	-8.3259	-27.8274	0.4	28.9		1387	14
GX229-3	-0.87	Dalong	C. yini	Pre-extinction				0.8			780	25
GX229-2	-0.98	Dalong	C. yini	Pre-extinction	0.9319	-6.6019	-25.9114	0.6	26.8	1.7	906	22	12.5
GX229-1	-1.09	Dalong	C. yini	Pre-extinction	0.7165	-7.8957	-26.27	0.7	27
GX228-3	-1.17	Dalong	C. yini	Pre-extinction	1.2702	-6.1411	-27.1714	0.7	28.4		1286	3
GX228-2	-1.25	Dalong	C. yini	Pre-extinction	1.4853	-6.6771	-25.8394	0.6	27.3	0.4	677	6	30.83
GX228-1	-1.32	Dalong	C. yini	Pre-extinction	1.1449	-8.1485	-26.0654	0.5	27.2		995	0
GX227	-1.37	Dalong	C. yini	Pre-extinction	0.9223	-8.8433	-26.1134	0.4	27	1	1377	8	13.33
GX225	-1.42	Dalong	C. yini	Pre-extinction	1.19	-7.16	-25.2894	0.3	26.5	0.4	934	4	20.83
GX224	-1.52	Dalong	C. yini	Pre-extinction						0.2			74.17
GX221	-1.85	Dalong	C. yini	Pre-extinction	1.24	-7.13	-26.1194		27.4	0.8			16.67
GX220	-1.96	Dalong	C. yini	Pre-extinction	1.0287	-6.8674	-25.2344	-0.1	26.3	0.5	1385	4	15.83
GX219	-2.01	Dalong	C. yini	Pre-extinction	1.0468	-8.9247	-26.298		27.3	1.5			9.17
GX216	-2.45	Dalong	C. changxingensis	Pre-extinction	1.5009	-6.0977	-24.455		26	0.3			35.83
GX215	-2.62	Dalong	C. changxingensis	Pre-extinction	0.8348	-6.3606	-24.8734	0.1	25.7	0.3			57.5
GX213	-2.94	Dalong	C. changxingensis	Pre-extinction	1.0936	-9.3485	-25.273	0	26.4	0.5			11.67
GX212	-3.03	Dalong	C. changxingensis	Pre-extinction	1.64	-6.62	-25.3	0.3	26.9	0.4	755	6	35.83
GX211-2	-3.03	Dalong	C. changxingensis	Pre-extinction	0.3639	-6.3695	-25.222		25.6	0.2			72.5
GX211-1	-3.29	Dalong	C. changxingensis	Pre-extinction	1.5881	-6.9901	-25.6724	0.2	27.3	0.5	985	5	34.17
GX210-3	-3.4	Dalong	C. changxingensis	Pre-extinction	1.37	-6.68	-24.7704		26.1	0.2			90
GX210-1	-3.6	Dalong	C. changxingensis	Pre-extinction	1.5739	-7.0847	-24.737		26.3	0.4			21.67
GX209-2	-3.72	Dalong	C. changxingensis	Pre-extinction	1.2869	-6.2484	-26.9304	0.2	28.2	0.3	443	7	70
GX209-1	-3.86	Dalong	C. changxingensis	Pre-extinction	1.5977	-6.8648	-25.303	0	26.9	0.4			35
GX208	-3.97	Dalong	C. changxingensis	Pre-extinction	1.7074	-7.1011	-26.5234		28.2	1.8			28.33
GX207	-4.05	Dalong	C. changxingensis	Pre-extinction	1.8138	-6.0818	-26.1794	0.1	28	0.4	757	7	47.5
GX206-1	-4.2	Dalong	C. changxingensis	Pre-extinction	1.6787	-6.0106	-26.2864	0.1	28	0.5	834	7	46.67
GX-205-2H	-15.16	Dalong	C. changxingensis	Pre-extinction						0.5
GX205-2	-4.29	Dalong	C. changxingensis	Pre-extinction	1.6509	-6.8052	-26.0344	0.1	27.7	0.8	1114	8	40
GX205-1	-4.4	Dalong	C. changxingensis	Pre-extinction				-0.2		0.3	858	5	44.17
GX204-2	-4.49	Dalong	C. changxingensis	Pre-extinction	0.8585	-7.1156	-25.324		26.2	0.2			86.67
GX204-1	-4.58	Dalong	C. changxingensis	Pre-extinction	1.42	-7.61	-24.764	0.6	26.2	0.2	166	14	90.83
GX203	-4.65	Dalong	C. changxingensis	Pre-extinction	1.719	-6.8273	-23.892	-0.2	25.6	0.3	1585	2	16.67
GX201	-4.89	Dalong	C. changxingensis	Pre-extinction	1.8363	-4.7753	-25.433	0	27.3	0.3	844	5	44.17
GX200	-5.18	Dalong	C. changxingensis	Pre-extinction	1.2159	-7.2075	-25.494	0.4	26.7	0.2	311	9	80.83
GX199	-5.45	Dalong	C. changxingensis	Pre-extinction	2.0351	-5.2008	-25.574	0.1	27.6	0.2	500	5	66.67
GX196-197	-5.72	Dalong	C. changxingensis	Pre-extinction	1.4659	-6.9384	-24.827		26.3	0.3			53.33
GX194-195	-5.91	Dalong	C. changxingensis	Pre-extinction	1.3714	-6.6504	-24.572	0.7	25.9	0.2	88	25	94.17
GX193	-6.04	Dalong	C. changxingensis	Pre-extinction	1.7463	-6.772	-24.87	0.2	26.6	0.5	1150	5	32.5
GX192	-6.15	Dalong	C. changxingensis	Pre-extinction						0.3			60.83
GX191	-6.23	Dalong	C. changxingensis	Pre-extinction	1.43	-10.2154	-24.635		26.1	0.8			27.5
GX190	-6.35	Dalong	C. changxingensis	Pre-extinction				0.5		0.2	252	10	85
GX-189H	-6.5	Dalong	C. changxingensis	Pre-extinction						0.3			45
GX187	-6.64	Dalong	C. changxingensis	Pre-extinction	1.7726	-7.0442	-25.19		27	0.8			28.33
GX186	-6.7	Dalong	C. changxingensis	Pre-extinction				-0.2		0.5	1272	5	29.17
GX184	-6.77	Dalong	C. changxingensis	Pre-extinction				-0.2		0.4	615	8	48.33
GX182	-6.88	Dalong	C. changxingensis	Pre-extinction	2.0413	-7.0281	-25.667	0.2	27.7	2.4	522	54	67.5
GX180	-6.99	Dalong	C. changxingensis	Pre-extinction				0.7		3.4	1063	38	60
GX179	-7.04	Dalong	C. changxingensis	Pre-extinction				1.2		1	335	34	85
GX178	-7.12	Dalong	C. changxingensis	Pre-extinction	2.0225	-7.6981	-25.471	0.8	27.5	1.9	757	30	61.67
GX177	-7.21	Dalong	C. changxingensis	Pre-extinction				1.2		2	1029	22	58.33
GX176	-7.27	Dalong	C. changxingensis	Pre-extinction				0.8		2.8	897	36	64.17
GX175	-7.36	Dalong	C. changxingensis	Pre-extinction	1.9214	-7.6811	-25.69		27.6	2.4			54.17
GX174	-7.45	Dalong	C. changxingensis	Pre-extinction	1.9738	-7.4974	-26.113	0.9	28.1	2.2	614	42	79.17
GX173	-7.58	Dalong	C. changxingensis	Pre-extinction	0.5	-6.68	-25.953	1.2	26.5	0.4	118	40	95.83
GX172	-7.69	Dalong	C. changxingensis	Pre-extinction	2.4167	-7.1371	-26.068	0.8	28.5	0.5	193	30	92.5
GX171	-7.78	Dalong	C. changxingensis	Pre-extinction						0.5			91.67
GX170	-7.93	Dalong	C. changxingensis	Pre-extinction	1.489	-9.0798	-26.447	0.8	27.9	3.8	1641	27	50
GX169	-8.06	Dalong	C. changxingensis	Pre-extinction	1.6405	-7.0151	-26.457	1	28.1	3.3	882	43	77.5
GX168	-8.23	Dalong	C. changxingensis	Pre-extinction	1.0845	-7.2893	-26.37	1.4	27.5	0.7	286	27	90.83
GX160-167	-8.46	Dalong	C. changxingensis	Pre-extinction				1		3.6	962	44	61.67
GX159	-8.65	Dalong	C. changxingensis	Pre-extinction	1.9389	-4.9754	-26.361	1	28.3	4.8	1665	34	52.5
GX158	-8.78	Dalong	C. changxingensis	Pre-extinction	1.83	-8.01	-26.329	1.1	28.2	8.8	2829	36	49.17
GX157	-8.91	Dalong	C. changxingensis	Pre-extinction	1.62	-8.52	-26.559	1.3	28.2	3.9	1851	25	60
GX156	-9.02	Dalong	C. changxingensis	Pre-extinction						1.4			83.33
GX155	-9.16	Dalong	C. wangi	Pre-extinction	1.7206	-5.8636	-26.413	1.3	28.1	1.6	621	30	77.5
GX153	-9.28	Dalong	C. wangi	Pre-extinction	2.1701	-7.0895	-26.093	0.7	28.3	7.3	1753	49	60
GX152	-9.36	Dalong	C. wangi	Pre-extinction	2.0997	-5.2524	-26.485	1	28.6	4.8	1816	31	55.83
GX151	-9.46	Dalong	C. wangi	Pre-extinction	2.39	-8.09	-26.116		28.5	6.9			64.17
GX150	-9.53	Dalong	C. wangi	Pre-extinction	1.9043	-6.9357	-26.346	0.8	28.3	5.1	1647	36	55
GX149	-9.58	Dalong	C. wangi	Pre-extinction	1.6335	-6.8809	-26.444	1.3	28.1	2.9	988	34	66.67
GX148	-9.63	Dalong	C. wangi	Pre-extinction				1.1		2.1	745	33	67.5
GX147	-9.79	Dalong	C. wangi	Pre-extinction	-0.0998	-6.5921	-26.609	0.6	26.5	0.8	191	46	92.5
GX146	-9.97	Dalong	C. wangi	Pre-extinction	1.3829	-8.1823	-26.469	1	27.9	5.8	2443	27	11.67
GX-144H	-10.05	Dalong	C. wangi	Pre-extinction						4.8			40.83
GX143	-10.09	Dalong	C. wangi	Pre-extinction	1.1311	-6.8104	-26.454	1.9	27.6	3.8	1497	29	30.83
GX142	-10.14	Dalong	C. wangi	Pre-extinction	1.51	-6.48	-26.506	2.2	28	0.4			82.5
GX141	-10.19	Dalong	C. wangi	Pre-extinction	1.0738	-6.1564	-26.354	1.8	27.4	3.8	1822	24	50.83
GX140	-10.25	Dalong	C. wangi	Pre-extinction	1.1475	-9.7564	-26.098	1.2	27.2	6.1	2044	35	55
GX139	-10.38	Dalong	C. wangi	Pre-extinction	-0.131	-6.5172	-26.284	1	26.2	1.4	676	25	80
GX138	-10.5	Dalong	C. wangi	Pre-extinction	-0.1883	-6.9937	-26.154		26	5.6			59.17
GX136	-10.59	Dalong	C. wangi	Pre-extinction						1.8			79.17
GX132	-11.06	Dalong	C. wangi	Pre-extinction	0.949	-8.5185	-26.257		27.2	6.6			60.83
GX130	-11.31	Dalong	C. wangi	Pre-extinction	0.8388	-7.3274	-25.982	0.9	26.8	4.1	1303	37	62.5
GX127	-11.56	Dalong	C. wangi	Pre-extinction	-0.3237	-6.2932	-26.14		25.8	0.8			90
GX125	-11.7	Dalong	C. wangi	Pre-extinction	0.75	-4.91	-26.15	1.3	26.9	5.3	1686	37	51.67
GX124	-11.75	Dalong	C. wangi	Pre-extinction	-0.8	-9.56	-26.041	0.5	25.2	9.1	2519	42	41.67
GX123	-11.81	Dalong	C. wangi	Pre-extinction	0.8103	-7.7919	-25.981	1.6	26.8	6.5	2009	38	45.83
GX122	-11.89	Dalong	C. wangi	Pre-extinction	1.13	-6.68	-26.034	1.5	27.2	6.3	1830	40	56.67
GX120	-12.05	Dalong	C. wangi	Pre-extinction	0.0311	-4.3993	-26.215	1.5	26.2	0.3	218	14	95
GX119	-12.19	Dalong	C. wangi	Pre-extinction	-2.11	-6.09	-26.222	1.2	24.1	0.3	512	6	83.33
GX117	-12.45	Dalong	C. wangi	Pre-extinction	-1.8833	-6.2428	-25.911	1.2	24	0.2	334	8	88.33
GX115	-12.72	Dalong	C. wangi	Pre-extinction	-1.3092	-5.7153	-25.942		24.6	0.5			77.5
GX113	-12.87	Dalong	C. wangi	Pre-extinction	-2.59	-5.59	-25.688	1.4	23.1	0.2	172	13	95
GX112	-12.96	Dalong	C. wangi	Pre-extinction	0.5116	-5.6582	-25.102	1	25.6	0.7	5141	1	19.17
GX110	-13.16	Dalong	C. wangi	Pre-extinction	1.8298	-6.7778	-24.651	0.8	26.5
GX108	-13.34	Dalong	C. wangi	Pre-extinction	0.23	-8.46	-24.886	0.3	25.1	0.6	6120	1	19.17
GX107	-13.39	Dalong	C. wangi	Pre-extinction	0.4397	-7.1696	-24.671	0.6	25.1	0.5	6221	1	22.5
GX106	-13.44	Dalong	C. wangi	Pre-extinction	0.1405	-5.0925	-24.746	0.3	24.9	0.6	6469	1	20
GX-104	-13.58	Dalong	C. wangi	Pre-extinction	-2.52	-5.76	-25.919	1.7	23.4	0.2	421	6	89.17
GX103	-13.7	Dalong	C. orientalis	Pre-extinction	-0.3146	-7.6808	-25.041	0.7	24.7	0.7	4133	2	34.17
GX102	-13.75	Dalong	C. orientalis	Pre-extinction	-0.7903	-10.3521	-25.1	0.1	24.3	2.8	7437	4	6.67
GX-101	-13.78	Dalong	C. orientalis	Pre-extinction	-0.2053	-6.3346	-25.173	1.1	25	1.5	2391	7	41.67
GX-100	-13.85	Dalong	C. orientalis	Pre-extinction	-0.19	-8.51	-25.514	1.5	25.3	1.9	2149	10	36.67
GX99	-13.99	Dalong	C. orientalis	Pre-extinction	0.52	-4.23	-25.613	1	26.1	1.9	2033	11	33.33
GX98-2	-14.1	Dalong	C. orientalis	Pre-extinction	-0.69	-8.41	-25.578	0.4	24.9	5.6	9487	7
GX97	-14.17	Dalong	C. orientalis	Pre-extinction	0.8187	-6.6588	-25.925		26.7	2.1			44.17
GX-96-2H	-14.27	Dalong	C. orientalis	Pre-extinction						4.2	8634	6
GX95	-14.38	Dalong	C. orientalis	Pre-extinction	1.0375	-6.1943	-26.564	1	27.6	4.6	3903	14	11.67
GX93	-14.51	Dalong	C. orientalis	Pre-extinction	0.4472	-9.7534	-26.799	0.8	27.2	3.1	3024	12	28.33
GX-91	-14.69	Dalong	C. orientalis	Pre-extinction						3			33.33
GX90	-14.8	Dalong	C. orientalis	Pre-extinction						7			27.5
GX89	-14.85	Dalong	C. orientalis	Pre-extinction	0.44	-6.75	-26.579	0.7	27	9.1	3379	31	5.83
GX88	-14.91	Dalong	C. orientalis	Pre-extinction	0.1875	-7.3205	-26.746	0.6	26.9	6.5	2376	32	20.83
GX87	-14.95	Dalong	C. orientalis	Pre-extinction	0.5618	-8.0627	-26.641		27.2	8			9.17
GX85-2	-15.01	Dalong	C. orientalis	Pre-extinction	0.35	-5.22	-26.678	0.8	27	6.4	2358	32	15.83
GX85-1	-15.05	Dalong	C. orientalis	Pre-extinction	0.4532	-5.5775	-26.299	0.9	26.8	9.1	4107	26	24.17
GX84	-15.1	Dalong	C. orientalis	Pre-extinction	-0.4977	-6.8459	-26.581		26.1				39.17
GX83-2	-15.15	Dalong	C. orientalis	Pre-extinction	-0.0438	-3.434	-25.86		25.8				21.67
#: +/- means above/below the lithological boundary
Chaotian section
Sample No.	Depth#	Formation	Conodont zone	Time Interval	δ13Ccarb	δ18Ocarb	δ13Corg	δ15N	δ13Ccarb-δ13Corg
	(m)				(‰,VPDB)	(‰,VPDB)	(‰,VPDB)	vs air ( ‰)	(‰,VPDB)
G27	4.96	Feixianguan	Isarcicella	Post-extinction	-1.876	-6.962	-29.144		27.3
G26	4.61	Feixianguan	Isarcicella	Post-extinction	-2.128	-6.801	-29.542	-1.692	27.4
G25	4.56	Feixianguan	Isarcicella	Post-extinction			-28.894	-0.2
G24	4.51	Feixianguan	Isarcicella	Post-extinction	-2.141	-5.652	-28.101	0.3	26
G23	4.46	Feixianguan	Isarcicella	Post-extinction	-2.47	-6.64	-27.148	-0.1	24.7
G22	4.39	Feixianguan	Isarcicella	Post-extinction	-2.583	-7.105	-27.955	-0.1	25.4
G21	4.27	Feixianguan	Isarcicella	Post-extinction	-2.293	-6.759	-28.793	0	26.5
G20	4.21	Feixianguan	Isarcicella	Post-extinction	-2.227	-6.712	-27.393	0.4	25.2
G19	4.18	Feixianguan	Isarcicella	Post-extinction	-2.145	-6.639	-28.61	0.3	26.5
G18	4.16	Feixianguan	Isarcicella	Post-extinction	-1.694	-6.232	-28.994	0	27.3
G17	4.15	Feixianguan	Isarcicella	Post-extinction	-1.951	-6.495	-27.876	0.1	25.9
G16	4.13	Feixianguan	Isarcicella	Post-extinction			-29.354	0.2
G15	4.1	Feixianguan	Isarcicella	Post-extinction	-1.605	-5.536	-28.262	0.2	26.7
G14	4.06	Feixianguan	Isarcicella	Post-extinction	-1.703	-5.703	-27.514	-2.01877	25.8
G13	4.02	Feixianguan	Isarcicella	Post-extinction	-2.409	-6.924	-28.474	0.3	26.1
G12	3.95	Feixianguan	H. parvus	Post-extinction	-1.857	-6.217	-28.297	-0.4	26.4
G11	3.8	Feixianguan	H. parvus	Post-extinction	-1.565	-6.252	-30.196	0.254043	28.6
G10	3.6	Feixianguan	H. parvus	Post-extinction	-1.683	-5.265	-30.814	-0.858037	29.1
G9	3.51	Feixianguan	H. parvus	Post-extinction	-2.05	-6.399	-30.571	-0.4	28.5
G8	3.44	Feixianguan	H. parvus	Post-extinction	-1.969	-6.306	-28.854	-0.6	26.9
G7	3.33	Feixianguan	H. parvus	Post-extinction	-1.709	-6.077	-29.904	-0.601154	28.2
G6	3.21	Feixianguan	H. parvus	Post-extinction	-2.03	-6.524	-30.06	-1.36682	28
G5	3.12	Feixianguan	H. parvus	Post-extinction	-1.611	-6.141	-30.976	-0.7	29.4
G4	3.03	Feixianguan	H. parvus	Post-extinction	-1.735	-6.096	-31.057	-0.795504	29.3
G3	2.95	Feixianguan	H. parvus	Post-extinction	-1.838	-6.061	-30.688	-0.653833	28.9
G2	2.8	Feixianguan	H. parvus	Post-extinction	-1.795	-6.315	-30.976	0.50821	29.2
G1	2.64	Feixianguan	H. parvus	Post-extinction	-2.001	-6.121	-31.169	-0.0766901	29.2
F9	2.6	Feixianguan	H. parvus	Post-extinction	-1.939	-6.376	-30.235	-1.06071	28.3
F8	2.52	Feixianguan	H. parvus	Post-extinction	-1.876	-6.097		0
F7	2.45	Feixianguan	H. parvus	Post-extinction	-1.904	-5.5	-30.559	1.16338	28.7
F6	2.32	Feixianguan	H. parvus	Post-extinction	-3.11	-7.341	-26.972	-0.1	23.9
F5	2.07	Feixianguan	H. parvus	Post-extinction	-1.93	-5.577	-29.063	-0.8	27.1
F4	1.96	Feixianguan	H. parvus	Post-extinction	-2.073	-5.903	-27.1	-0.2	25
F3	1.79	Feixianguan	H. parvus	Post-extinction	-1.583	-6.378	-30.075	0	28.5
F2	1.7	Feixianguan	H. parvus	Post-extinction	-1.715	-6.055	-30.041	1.59034	28.3
F1	1.51	Feixianguan	H. parvus	Post-extinction	-1.487	-5.946	-29.005	1.02696	27.5
E18	1.32	Feixianguan	Barren	Post-extinction	-0.784	-4.594	-22.018	0	21.2
E17	1.28	Feixianguan	Barren	Post-extinction			-29.614	0.1
E16	1.25	Feixianguan	Barren	Post-extinction			-25.083	0.2
E15	1.19	Feixianguan	Barren	Post-extinction	-0.578	-4.856	-24.8	0.1	24.2
E14	1.13	Feixianguan	Barren	Post-extinction	-1.666	-5.606	-30.022	0.3	28.4
E13	1.03	Feixianguan	Barren	Post-extinction	-0.436	-5.303		-0.382836
E12	0.93	Feixianguan	Barren	Post-extinction	-0.554	-5.542	-25.41	-2.00063	24.9
E11	0.83	Feixianguan	Barren	Post-extinction	-0.418	-4.71	-29.267	0.2	28.8
E10	0.72	Feixianguan	Barren	Post-extinction	-0.322	-4.272	-25.661	0.2	25.3
E9	0.54	Feixianguan	Barren	Post-extinction	-0.266	-3.984	-25.982	0.3	25.7
E8	0.49	Feixianguan	Barren	Post-extinction	-0.178	-4.716	-25.171	0.1	25
E7	0.45	Feixianguan	Barren	Post-extinction			-25.851	0.4
E6	0.34	Feixianguan	Barren	Post-extinction	-0.315	-4.362	-25.727	0.3	25.4
E5	0.27	Feixianguan	Barren	Post-extinction	-0.525	-4.839	-26.392	0.2	25.9
E4	0.22	Feixianguan	Barren	Post-extinction			-26.295	0.3
E3	0.18	Feixianguan	Barren	Post-extinction			-26.769	0.6
E2	0.13	Feixianguan	Barren	Post-extinction	-0.298	-7.235	-24.1	0.1	23.8
E1	0.09	Feixianguan	Barren	Post-extinction			-26.082	0.1
D23	-0.01	Dalong	C. t–z–y	Pre-extinction	0.236	-6.316	-24.879	0.05	25.1
D22	-0.09	Dalong	C. t–z–y	Pre-extinction	0.495	-5.829	-26.09	0.1	26.6
D21	-0.17	Dalong	C. t–z–y	Pre-extinction	0.27	-4.954	-25.793	0.15	26.1
D20	-0.24	Dalong	C. t–z–y	Pre-extinction	-0.468	-5.456	-27.117	-0.324	26.6
D19	-0.34	Dalong	C. t–z–y	Pre-extinction	0.276	-7.635	-25.446	-0.2	25.7
D18	-0.43	Dalong	C. t–z–y	Pre-extinction	0.274	-6.992	-26.098	0.2	26.4
D17	-0.52	Dalong	C. t–z–y	Pre-extinction	0.897	-6.095
D16	-0.6	Dalong	C. t–z–y	Pre-extinction	-0.432	-8.042	-26.484	-0.2	26.1
D15	-0.71	Dalong	C. t–z–y	Pre-extinction	-0.785	-5.929		-2.918
D14	-0.86	Dalong	C. t–z–y	Pre-extinction	0.916	-5.502	-23.999	0.4	24.9
D13	-0.97	Dalong	C. t–z–y	Pre-extinction	0.204	-5.748	-25.897	0	26.1
D12	-1.01	Dalong	C. t–z–y	Pre-extinction			-24.638	0.2
D11	-1.05	Dalong	C. t–z–y	Pre-extinction	-0.733	-6.602	-25.078	0.3	24.3
D10	-1.14	Dalong	C. t–z–y	Pre-extinction	0.749	-5.535		-0.706999
D9	-1.19	Dalong	C. t–z–y	Pre-extinction	0.604	-6.204	-25.066	0.1	25.7
D8	-1.3	Dalong	C. t–z–y	Pre-extinction	0.775	-6.228	-25.16	0.3	25.9
D7	-1.43	Dalong	C. t–z–y	Pre-extinction	0.983	-5.248	-25.245	-0.0497592	26.2
D6	-1.54	Dalong	C. t–z–y	Pre-extinction	1.015	-5.583	-25.518	0.6	26.5
D5	-1.66	Dalong	C. p–sp.	Pre-extinction	0.841	-4.856	-24.438	0.6	25.3
D4	-1.75	Dalong	C. p–sp.	Pre-extinction			-25.351	0.3
D3	-1.8	Dalong	C. p–sp.	Pre-extinction	1.616	-5.72	-26.814	1.04812	28.4
D2	-1.94	Dalong	C. p–sp.	Pre-extinction	1.289	-4.543	-25.806	0.205749	27.1
D1	-2.07	Dalong	C. p–sp.	Pre-extinction	-1.798	-8.207	-25.618	0.1	23.8
C14	-2.14	Dalong	C. p–sp.	Pre-extinction	0.168	-7.164	-24.457	0.4	24.6
C13	-2.24	Dalong	C. p–sp.	Pre-extinction	-0.035	-7.245	-25.719	0.7	25.7
C12	-2.41	Dalong	C. p–sp.	Pre-extinction	0.021	-7.716	-25.705	0.3	25.7
C11	-2.51	Dalong	C. p–sp.	Pre-extinction	-0.058	-5.461	-24.742	0.3	24.7
C10	-2.59	Dalong	C. c–s	Pre-extinction	-0.016	-7.227	-24.562	0.1	24.5
C9	-2.7	Dalong	C. c–s	Pre-extinction	-0.363	-3.814		0.0689104
C8	-2.81	Dalong	C. c–s	Pre-extinction	-0.551	-7.421	-26.071	0	25.5
C7	-2.87	Dalong	C. c–s	Pre-extinction	-0.61	-7.803	-25.55	0.2	24.9
C6	-2.93	Dalong	C. c–s	Pre-extinction	-0.77	-6.536	-25.409	0.1	24.6
C5	-3.01	Dalong	C. c–s	Pre-extinction	0.022	-7.445	-25.401	0.1	25.4
C3	-3.22	Dalong	C. c–s	Pre-extinction	-0.001	-7.044	-24.968	0.3	25
C2	-3.32	Dalong	C. c–s	Pre-extinction	-1.841	-4.51	-26.502	0.786954	24.7
C1	-3.43	Dalong	C. c–s	Pre-extinction	-0.31	-7.732	-26.578	0.3	26.3
B18	-3.44	Dalong	C. c–s	Pre-extinction	-1.351	-7.586	-26.703	0.9	25.4
B17	-3.56	Dalong	C. c–s	Pre-extinction	-0.866	-7.341	-27.225	0.5	26.4
B16	-3.64	Dalong	C. c–s	Pre-extinction	-1.066	-7.669	-26.694	1	25.6
B15	-3.78	Dalong	C. c–s	Pre-extinction	-0.255	-7.579	-26.735	0.8	26.5
B14	-3.99	Dalong	C. c–s	Pre-extinction	-0.704	-5.99	-27.052	1.5	26.3
B13	-4.18	Dalong	C. c–s	Pre-extinction	0.375	-7.35	-27.033	1.3	27.4
B12	-4.26	Dalong	C. c–s	Pre-extinction	0.052	-7.52	-27.106	0.8	27.2
B11	-4.34	Dalong	C. c–s	Pre-extinction	0.198	-7.08	-26.009	1.3	26.2
B10	-4.58	Dalong	C. c–s	Pre-extinction	0.841	-7.413	-26.138	1.9	27
B9	-4.73	Dalong	C. c–s	Pre-extinction	1.043	-7.431	-25.843	1.4	26.9
B8	-4.82	Dalong	C. c–s	Pre-extinction	0.812	-7.368	-25.617	1.4	26.4
B7	-5.14	Dalong	C. c–s	Pre-extinction	0.672	-7.259	-25.582	0.7	26.3
B6	-5.22	Dalong	C. c–s	Pre-extinction	0.57	-7.418	-26.441	1.1	27
B5	-5.34	Dalong	C. c–s	Pre-extinction	1.013	-7.506	-26.38	1.7	27.4
B4	-5.42	Dalong	C. c–s	Pre-extinction	0.311	-7.018	-26.295	1.15	26.6
B3	-5.56	Dalong	C. c–s	Pre-extinction	-0.511	-7.244	-26.481	1.15	26
B2	-5.66	Dalong	C. c–s	Pre-extinction	-1.254	-6.882	-26.7	1.5	25.4
B1	-5.76	Dalong	C. c–s	Pre-extinction	-0.716	-6.844	-26.716	0.8	26
#: +/- means above/below the lithological boundary

## Sheet: Data cited in this study
Zuodeng section（Luo et al.，2011）
Sample	Depth#	Formation	Time Interval	δ15N	δ13Corg	δ13Ccarb	δ13Ccarb-δ13Corg	Carbonate
No.	(cm)			vs air ( ‰)	(‰,VPDB	(‰,VPDB)	(‰,VPDB)	(wt %)
Zu-5	890	Majiaoling	Post-extinction	-0.2	-24.6	1.5	26.1	84
Zu-4	860	Majiaoling	Post-extinction	1	-25.3	1.7	26.9	98
Zu-2	724.5	Majiaoling	Post-extinction	0.5	-25.5			88
Z685-695	690	Majiaoling	Post-extinction	0.8	-27.1	0.7	27.8	95
Z675-685	680	Majiaoling	Post-extinction	-0.1	-25.5	0.4	25.9	78
Z625-645	635	Majiaoling	Post-extinction	-0.3	-27.4	0.6	28	93
Z605-625	615	Majiaoling	Post-extinction	0.9	-26.7	0.4	27.1	97
Z580-605	592.5	Majiaoling	Post-extinction	0.8	-27.6	0.3	27.9	96
Z550-580	565	Majiaoling	Post-extinction	1.9	-26.5	0.4	26.9	99
Z525-550	537.5	Majiaoling	Post-extinction	1.2	-26.3	0.6	26.9	97
Z500-525	512.5	Majiaoling	Post-extinction	0.2	-27.3	0.7	28	95
Z485-495	490	Majiaoling	Post-extinction	1.1	-27	0.7	27.7	94
Z460-470	465	Majiaoling	Post-extinction	-0.2	-26	0.4	26.4	95
Z400-410	405	Majiaoling	Post-extinction	1.2	-28	0.6	28.6	99
Z365-370	367.5	Majiaoling	Post-extinction	0.2	-27.4	0.7	28	96
Z345-355	350	Majiaoling	Post-extinction	0.2	-27.6	0.8	28.4	89
Z280-290	285	Majiaoling	Post-extinction		-27	0.8	27.8	88
Z255-260	257.5	Majiaoling	Post-extinction	0.9	-27.2	0.9	28.1	94
Z220-236	228	Majiaoling	Post-extinction	1.9	-26.5	0.8	27.3	94
Z155-185	170	Majiaoling	Post-extinction	0.2	-27.3	0.9	28.2	93
Z135-140	137.5	Majiaoling	Post-extinction		-27.3	0.8	28.1	95
Z115-135	125	Majiaoling	Post-extinction	0.4	-27.2	0.7	27.9	95
Z90-110	100	Majiaoling	Post-extinction	1	-27.4	0.5	27.9	96
Z70-90	80	Majiaoling	Post-extinction	0.9	-27.1	1.1	28.2	96
Z50-70	60	Majiaoling	Post-extinction	0.5	-27.5	1	28.5	96
Z30-50	40	Majiaoling	Post-extinction	0.6	-27.8	1.1	28.9	96
Z14-30	22	Majiaoling	Post-extinction	1.2	-28.3	1.2	29.5	95
Z0-14	7	Majiaoling	Post-extinction	1.3	-28.1	1	29.1	98
Zd-15	-15	Heshan	Pre-extinction	3.3		1.5		99
Zd-55	-55	Heshan	Pre-extinction	3.6	-24	2	26.1	97
Zd-108	-108	Heshan	Pre-extinction	3.4	-23.9	2.2	26.1	99
Zd-137	-137	Heshan	Pre-extinction	3.7	-24.6	1.9	26.5	98
Zd-193	-193	Heshan	Pre-extinction	5.9	-23.4	2.5	25.8	99
Zd-355	-355	Heshan	Pre-extinction	3.2	-23.7	1.9	25.7	98
Zd-472	-472	Heshan	Pre-extinction	4		1.8		99
Zd-531	-531	Heshan	Pre-extinction	5.4		2.4		99
#: +/- means above/below the lithological boundary
Taiping section（Luo et al.，2011）
Sample	Depth#	Formation	Time Interval	δ15N	δ13Corg	δ13Ccarb	δ13Ccarb-δ13Corg	Carbonate
No.	(cm)			vs air ( ‰)	(‰,VPDB	(‰,VPDB)	(‰,VPDB)	(wt %)
UT-7	518	Majiaoling	Post-extinction	-0.6	-29.1	0.3	29.4	0.97
UT-5	458.5	Majiaoling	Post-extinction	0.5	-28.6	-0.5	28.1	0.86
UT-4	453.5	Majiaoling	Post-extinction	0.1	-28.5	-0.1	28.4	0.84
UT-3	446	Majiaoling	Post-extinction	-0.6	-28.1	-0.5	27.6	0.84
UT-2	436	Majiaoling	Post-extinction	0.7	-28.3	-0.4	27.9	0.94
UT-1	421	Majiaoling	Post-extinction	0.2	-29	0.2	29.2	0.87
T445-451	408	Majiaoling	Post-extinction	0.9	-30.1	0.2	30.3	0.93
T425-445	395	Majiaoling	Post-extinction	0.6	-29.4	0.1	29.5	0.87
T406-425	375.5	Majiaoling	Post-extinction	0.5	-29	-0.3	28.7	0.95
T384-406	355	Majiaoling	Post-extinction	0.8	-28.9	-0.2	28.7	0.92
T360-384	332	Majiaoling	Post-extinction	1	-28.8	0	28.8	0.93
T337-360	308.5	Majiaoling	Post-extinction	0.8	-28.4	-0.3	28.1	0.92
T301-337	279	Majiaoling	Post-extinction	0	-28.2	-0.3	27.9	0.94
T280-301	250.5	Majiaoling	Post-extinction	0.7	-28.6	-0.5	28.1	0.94
T260-280	230	Majiaoling	Post-extinction	0.4	-28.5	0	28.5	0.92
T245-260	212.5	Majiaoling	Post-extinction	-1	-28	-0.1	27.9	0.9
T220-245	192.5	Majiaoling	Post-extinction	-0.7	-28.5	0	28.5	0.92
T200-220	170	Majiaoling	Post-extinction	1.2	-29.2	0	29.2	0.92
T165-203	144	Majiaoling	Post-extinction	0.6	-28.8	0.1	28.9	0.93
T145-165	115	Majiaoling	Post-extinction	0	-27.4	0.2	27.6	0.91
T125-145	95	Majiaoling	Post-extinction	0.6	-28.5	0.2	28.7	0.94
T80-110	55	Majiaoling	Post-extinction	-0.6	-27.9	0.2	28.1	0.9
T60-80	30	Majiaoling	Post-extinction	0	-28.7	0.6	29.3	0.94
T40-60	10	Majiaoling	Post-extinction	0.7	-28.7	0.7	29.4	0.98
T19-40	-10.5	Heshan	Pre-extinction	3	-26.6	0.7	27.3	0.98
T0-19	-20	Heshan	Pre-extinction	3.2	-26.2	1.1	27.3	0.98
TD-1	-42	Heshan	Pre-extinction	1.4	-27
TD-5	-67	Heshan	Pre-extinction	4	-25	2.1	27.1	0.96
TD-6	-92	Heshan	Pre-extinction	3	-25	1.9	26.9	0.93
TD-8	-139.5	Heshan	Pre-extinction	2.3	-26.1	2.4	28.5	0.9
TD-9	-185	Heshan	Pre-extinction	3.7	-25.5	2.9	28.4	0.96
TD-11	-273	Heshan	Pre-extinction	4.5	-28.6	3.2	31.8	0.51
TD-13	-436	Heshan	Pre-extinction	3.1	-26.7			0.84
TD-15	-645	Heshan	Pre-extinction	3.3	-26.8	2.3	29.1	0.88
TD-17	-823.5	Heshan	Pre-extinction	2.4	-25.9	3.1	29	0.45
#: +/- means above/below the lithological boundary
Meishan section (Cao et al., 2002)								Meishan section（Xie et al., 2007）						Meishan section (Cao et al., 2009)
Sample	Depth#	Formation	Time Interval	δ13Corg	δ13Ccarb	δ13Ccarb-δ13Corg		No.	Depth #	Formation	Time Interval	d13Ccarb		Sample	Depth#	Formation	Time Interval	δ13Corg	δ15N
No.	(cm)			(‰,VPDB)	(‰,VPDB)	(‰,VPDB)			(cm)			( ‰)		No.	(m)			(‰,VPDB)	vs air ( ‰)
1	199.25	Yinkeng	Post-extinction	-26.9908	-0.63	26.4		1	191	Yikeng	Post-extinction	-0.6		ms-1-34-12	97.55	Yinkeng	Post-extinction	-27.53	1.28
2	187.702	Yinkeng	Post-extinction	-27.6562				2	178	Yikeng	Post-extinction	-0.4		MS34-10	98.73	Yinkeng	Post-extinction	-29.14	0.89
3	185.554	Yinkeng	Post-extinction	-26.746	-0.46	26.3		3	177	Yikeng	Post-extinction	0.3		ms-1-34-8	99.39	Yinkeng	Post-extinction	-25.28
4	183.674	Yinkeng	Post-extinction	-27.1289				4	171	Yikeng	Post-extinction	-0.4		MS34-7	100.28	Yinkeng	Post-extinction	-29.24	0.85
5	178.034	Yinkeng	Post-extinction	-26.9657				5	165	Yikeng	Post-extinction	-0.5		ms-1-34-5	101.63	Yinkeng	Post-extinction	-25.54
6	167.829	Yinkeng	Post-extinction	-28.3843				6	160	Yikeng	Post-extinction	-0.4		ms-1-34-3	102.59	Yinkeng	Post-extinction	-30.3	0.11
7	149.03	Yinkeng	Post-extinction	-25.3713				7	152	Yikeng	Post-extinction	-0.4		ms-1-34-1	103.93	Yinkeng	Post-extinction	-29.66	0.31
8	138.825	Yinkeng	Post-extinction	-28.2902				8	144	Yikeng	Post-extinction	-0.4		ms-1-32-3	104.93	Yinkeng	Post-extinction	-25.59
9	125.935	Yinkeng	Post-extinction	-25.0637				9	135	Yikeng	Post-extinction	0.1		ms-1-32-1	105.09	Yinkeng	Post-extinction	-25.97
10	121.638	Yinkeng	Post-extinction	-26.0179				10	133	Yikeng	Post-extinction	-0.2		ms-1-30-3	105.43	Yinkeng	Post-extinction	-28.23
11	113.044	Yinkeng	Post-extinction	-25.2081				11	127	Yikeng	Post-extinction	-0.2		ms-1-30-1	105.93	Yinkeng	Post-extinction	-25.95	0.26
12	110.09	Yinkeng	Post-extinction	-28.8426	0.2	29		12	119	Yikeng	Post-extinction	0.4		ms-1-29-2	106.08	Yinkeng	Post-extinction	-26.5
13	95.588	Yinkeng	Post-extinction	-27.5746				13	112	Yikeng	Post-extinction	-0.1		ms-1-29-1	106.16	Yinkeng	Post-extinction
14	75.4465	Yinkeng	Post-extinction	-25.0574				14	99	Yikeng	Post-extinction	0.9		ms-1-27-3	106.38	Yinkeng	Post-extinction	-24.91
15	70.881	Yinkeng	Post-extinction	-29.1313	0.22	29.4		15	95	Yikeng	Post-extinction	0.8		ms-1-27-2	106.39	Yinkeng	Post-extinction	-26.47
16	52.6193	Yinkeng	Post-extinction	-25.3839				16	89	Yikeng	Post-extinction	0.7		ms-1-27-1	106.49	Yinkeng	Post-extinction	-27.3
17	45.0998	Yinkeng	Post-extinction	-26.9845	0.55	27.5		17	86	Yikeng	Post-extinction	0.7		ms-1-26-3	106.52	Yinkeng	Post-extinction	-32.79	0.28
18	41.3401	Yinkeng	Post-extinction					18	84	Yikeng	Post-extinction	0.7		ms-1-26-2	106.56	Yinkeng	Post-extinction	-31.4	-0.51
19	38.5693	Yinkeng	Post-extinction	-25.3	0.7	26		19	83	Yikeng	Post-extinction	0.9		ms-1-26-1	106.6	Yinkeng	Post-extinction	-30.63	0.32
20	26.785	Yinkeng	Post-extinction	-25.1	0.9	26		20	81	Yikeng	Post-extinction	0.2		ms-1-24-8	106.74	Changxing	Pre-extinction	-28.82	2.22
21	23.4433	Yinkeng	Post-extinction		0.9			21	79	Yikeng	Post-extinction	-0.4		ms-1-24-2	107.1	Changxing	Pre-extinction	-29.56	1.44
22	20.4124	Yinkeng	Post-extinction	-26.4	0.7	27.1		22	75	Yikeng	Post-extinction	0.2		ms-1-24-6	107.94	Changxing	Pre-extinction	-30.17	1.74
23	16.7141	Yinkeng	Post-extinction	-25.4631	0.7	26.2		23	71	Yikeng	Post-extinction	0.1		MS23-2a	108.2	Changxing	Pre-extinction	-28.74	2.17
24	16.2048	Yinkeng	Post-extinction		0.7			24	67	Yikeng	Post-extinction	-0.3		MS23-1	108.56	Changxing	Pre-extinction
25	15.6811	Yinkeng	Post-extinction		0.4			25	63	Yikeng	Post-extinction	0.1		ms-1-23-4	109.4	Changxing	Pre-extinction	-28.38	2.41
26	15.2301	Yinkeng	Post-extinction		0.1			26	59	Yikeng	Post-extinction	-0.2		ms22-1	110.15	Changxing	Pre-extinction
27	14.7645	Yinkeng	Post-extinction	-25.815	0.3	26.1		27	56	Yikeng	Post-extinction	0.5		ms-1-22-3	111.04	Changxing	Pre-extinction	-27.34	2.83
28	14.2262	Yinkeng	Post-extinction		0.2			28	50	Yikeng	Post-extinction	1.1		MS05-2b	111.44	Changxing	Pre-extinction	-27.09	2.97
29	13.7606	Yinkeng	Post-extinction		0.1			29	46	Yikeng	Post-extinction	1.1		MS05-4	112.8	Changxing	Pre-extinction	-27.37	2.31
30	13.266	Yinkeng	Post-extinction		0.2			30	40	Yikeng	Post-extinction	1.1		ms05-5	113.9	Changxing	Pre-extinction	-28.24
31	12.7422	Yinkeng	Post-extinction	-25.8485	0.5	26.3		31	34	Yikeng	Post-extinction	1.2		MS05-8	114.81	Changxing	Pre-extinction	-28.11	1.61
32	12.2621	Yinkeng	Post-extinction		0.5			32	30	Yikeng	Post-extinction	1.1		ms05-10	116.51	Changxing	Pre-extinction	-29.08
33	11.7383	Yinkeng	Post-extinction		0.6			33	26	Yikeng	Post-extinction	0.8		ms05-15	119.09	Changxing	Pre-extinction	-29.73
34	11.3019	Yinkeng	Post-extinction		-0.1			34	25	Yikeng	Post-extinction	0.8		ms05-20	121.52	Changxing	Pre-extinction	-28.39
35	10.749	Yinkeng	Post-extinction		0.7			35	24	Yikeng	Post-extinction	0.8		#: depth in original paper
36	10.2398	Yinkeng	Post-extinction	-25.6139	0	25.6		36	23.5	Yikeng	Post-extinction	0.9
37	9.73059	Yinkeng	Post-extinction		-0.2			37	22	Yikeng	Post-extinction	0.6
38	9.26502	Yinkeng	Post-extinction		0.4			38	21	Yikeng	Post-extinction	0.5
39	8.72671	Yinkeng	Post-extinction	-26.6865	0.8	27.5		39	20.5	Yikeng	Post-extinction	0.3
40	8.2757	Yinkeng	Post-extinction		0.9			40	20	Yikeng	Post-extinction	0.3
41	7.75194	Yinkeng	Post-extinction	-25.8988	0.8	26.7		41	19	Yikeng	Post-extinction	0.4
42	7.28637	Yinkeng	Post-extinction		0.4			42	18.5	Yikeng	Post-extinction	1.1
43	6.76261	Yinkeng	Post-extinction		0.7			43	18	Yikeng	Post-extinction	1.5
44	6.2534	Yinkeng	Post-extinction		0.8			44	17	Yikeng	Post-extinction	1.3
45	5.68599	Yinkeng	Post-extinction		0.6			45	16.5	Yikeng	Post-extinction	0.7
46	5.22043	Yinkeng	Post-extinction		-0.2			46	16	Yikeng	Post-extinction	0.6
47	4.78396	Yinkeng	Post-extinction		-0.1			47	15	Yikeng	Post-extinction	0.1
48	4.27475	Yinkeng	Post-extinction		-0.1			48	14.5	Yikeng	Post-extinction	0.1
49	4.27475	Yinkeng	Post-extinction		0			49	14	Yikeng	Post-extinction	0.4
50	3.70734	Yinkeng	Post-extinction		0.3			50	13	Yikeng	Post-extinction	0.7
51	3.24178	Yinkeng	Post-extinction	-26.4687	0	26.5		51	12.5	Yikeng	Post-extinction	0.8
52	2.76167	Yinkeng	Post-extinction		0.2			52	11.5	Yikeng	Post-extinction	0.9
53	2.267	Yinkeng	Post-extinction		0			53	11	Yikeng	Post-extinction	0.9
54	1.77234	Yinkeng	Post-extinction		0			54	10	Yikeng	Post-extinction	-0.2
55	1.27768	Yinkeng	Post-extinction	-26.72	0	26.7		55	9.5	Yikeng	Post-extinction	-0.4
56	0.753918	Yinkeng	Post-extinction		-0.1			56	8.5	Yikeng	Post-extinction	-0.2
57	0.244706	Yinkeng	Post-extinction		-0.1			57	7.5	Yikeng	Post-extinction	-0.6
58	-0.328357	Yinkeng	Post-extinction		0.3			58	6.5	Yikeng	Post-extinction	-0.2
59	-1.37711	Yinkeng	Post-extinction		-0.5			59	5.5	Yikeng	Post-extinction	0.1
60	-2.42586	Yinkeng	Post-extinction		-0.6			60	3.5	Yikeng	Post-extinction	-0.7
61	-3.05503	Yinkeng	Post-extinction	-31.1	-0.7	30.4		61	2.5	Yikeng	Post-extinction	-0.2
62	-6.18389	Yinkeng	Post-extinction		-0.5			62	1.5	Yikeng	Post-extinction	-0.4
63	-6.84826	Yinkeng	Post-extinction	-31.2				63	0.5	Yikeng	Post-extinction	0
64	-9.41754	Yinkeng	Post-extinction		-1.08			64	-6.5	Changxing	Pre-extinction	1.7
65	-10.7285	Yinkeng	Post-extinction		0.8			65	-8.5	Changxing	Pre-extinction	1.7
66	-11.0781	Yinkeng	Post-extinction		1.3			66	-11.5	Changxing	Pre-extinction	1.5
67	-11.7542	Changxing	Before-extinction	-27.3	1.4	28.7		67	-12	Changxing	Pre-extinction	1.3
68	-13.5749	Changxing	Before-extinction	-28.6	1.4	30		68	-16	Changxing	Pre-extinction	1.8
69	-14.7487	Changxing	Before-extinction		1.69			69	-17.5	Changxing	Pre-extinction	1.4
70	-16.8118	Changxing	Before-extinction	-28.5	1.8	30.3		70	-18	Changxing	Pre-extinction	1.7
71	-21.7683	Changxing	Before-extinction	-28.5	2.07	30.6		71	-20	Changxing	Pre-extinction	1.6
72	-25.9155	Changxing	Before-extinction	-29.3		29.3		72	-21.5	Changxing	Pre-extinction	0.5
73	-27.5846	Changxing	Before-extinction	-29.1	1.32	30.4		73	-23.5	Changxing	Pre-extinction	0.5
74	-33.0468	Changxing	Before-extinction	-29.4	1.84	31.2		74	-26.5	Changxing	Pre-extinction	2.2
75	-37.8194	Changxing	Before-extinction	-28.8	2.5	31.3		75	-27.5	Changxing	Pre-extinction	2.5
76	-42.5872	Changxing	Before-extinction	-30.3	2.3	32.6		76	-30.5	Changxing	Pre-extinction	1.1
77	-49.4741	Changxing	Before-extinction	-30.1				77	-35.5	Changxing	Pre-extinction	1.8
78	-52	Changxing	Before-extinction		2.58			78	-37.5	Changxing	Pre-extinction	1.9
79	-55.8311	Changxing	Before-extinction	-29.8656	2.71	32.6		79	-38	Changxing	Pre-extinction	1.9
80	-61.1287	Changxing	Before-extinction	-29.7543				80	-38.5	Changxing	Pre-extinction	1.9
81	-62.718	Changxing	Before-extinction	-30.3486				81	-39.5	Changxing	Pre-extinction	2.2
82	-71.1941	Changxing	Before-extinction	-30.2621	3.04	33.3		82	-40.5	Changxing	Pre-extinction	2.6
83	-73.3131	Changxing	Before-extinction	-30.0397				83	-42	Changxing	Pre-extinction	2.8
84	-77.0214	Changxing	Before-extinction	-30.2745	3.17	33.4		84	-43	Changxing	Pre-extinction	2.4
85	-82.8488	Changxing	Before-extinction	-28.7534				85	-44	Changxing	Pre-extinction	2
86	-87.9865	Changxing	Before-extinction					86	-45.5	Changxing	Pre-extinction	2
87	-92.3844	Changxing	Before-extinction	-29.9038	3.26	33.2		87	-46.5	Changxing	Pre-extinction	2.4
88	-93.9737	Changxing	Before-extinction	-30.3498	3.56	33.9		88	-53.5	Changxing	Pre-extinction	3.2
89	-98.7415	Changxing	Before-extinction	-30.4228				89	-54	Changxing	Pre-extinction	2.2
90	-99.801	Changxing	Before-extinction	-30.4958				90	-55.5	Changxing	Pre-extinction	2.7
91	-104.039	Changxing	Before-extinction	-29.8038				91	-57.5	Changxing	Pre-extinction	2.3
92	-105	Changxing	Before-extinction					92	-58.5	Changxing	Pre-extinction	2.4
93	-108.277	Changxing	Before-extinction	-29.7543				93	-60.5	Changxing	Pre-extinction	2.2
94	-114.634	Changxing	Before-extinction	-29.4578	3.52	33		94	-63.5	Changxing	Pre-extinction	3.1
95	-119.402	Changxing	Before-extinction	-29.6184				95	-65.5	Changxing	Pre-extinction	2.8
96	-124.7	Changxing	Before-extinction	-29.7543	3.64	33.4		96	-68.5	Changxing	Pre-extinction	3.1
97	-127.878	Changxing	Before-extinction	-29.0623				97	-70.5	Changxing	Pre-extinction	2.5
98	-133.705	Changxing	Before-extinction	-28.9264				98	-71	Changxing	Pre-extinction	2.8
99	-140.592	Changxing	Before-extinction	-29.0129				99	-71.5	Changxing	Pre-extinction	3.5
100	-145.89	Changxing	Before-extinction	-28.8152				100	-72	Changxing	Pre-extinction	3.3
101	-150.128	Changxing	Before-extinction	-29.1735				101	-73	Changxing	Pre-extinction	3.5
102	-157.015	Changxing	Before-extinction	-28.9882				102	-74	Changxing	Pre-extinction	3.3
103	-163.902	Changxing	Before-extinction	-28.6792				103	-74.5	Changxing	Pre-extinction	3.5
104	-170.259	Changxing	Before-extinction	-28.6545				104	-79	Changxing	Pre-extinction	3.2
105	-173.967	Changxing	Before-extinction	-27.7648	3.96	31.7		105	-80	Changxing	Pre-extinction	2.9
106	-178.735	Changxing	Before-extinction	-27.6536				106	-81.5	Changxing	Pre-extinction	2.9
107	-184.032	Changxing	Before-extinction	-28.3456	3.94	32.3		107	-83.5	Changxing	Pre-extinction	2.8
108	-190.389	Changxing	Before-extinction	-27.1345				108	-84	Changxing	Pre-extinction	3.1
109	-199.395	Changxing	Before-extinction	-27.0851	3.98	31.1		109	-86.5	Changxing	Pre-extinction	3.3
110	-205.223	Changxing	Before-extinction	-27.3693				110	-88.5	Changxing	Pre-extinction	4
111	-211.05	Changxing	Before-extinction	-27.1222				111	-91	Changxing	Pre-extinction	4
112	-230.121	Changxing	Before-extinction	-27.184				112	-91.5	Changxing	Pre-extinction	3.4
113	-235.949	Changxing	Before-extinction	-27.0851	3.72	30.8		113	-92	Changxing	Pre-extinction	3.2
114	-248.663	Changxing	Before-extinction	-27.0975				114	-94	Changxing	Pre-extinction	3.2
115	-257.669	Changxing	Before-extinction	-26.8997				115	-95	Changxing	Pre-extinction	4
116	-271.442	Changxing	Before-extinction	-27.6041	4.35	32		116	-96.5	Changxing	Pre-extinction	3.8
117	-297.4	Changxing	Before-extinction	-27.0357	3.18	30.2		117	-99	Changxing	Pre-extinction	3.3
118	-311.704	Changxing	Before-extinction	-26.5908	3.58	30.2		118	-101	Changxing	Pre-extinction	3.7
119	-323.358	Changxing	Before-extinction	-26.8997	3.37	30.3		119	-103	Changxing	Pre-extinction	3.7
120	-323.888	Changxing	Before-extinction	-27.5547	4.21	31.8		120	-105	Changxing	Pre-extinction	3.3
121	-328.126	Changxing	Before-extinction	-28.1479	3.79	31.9		121	-108	Changxing	Pre-extinction	3.8
122	-330	Changxing	Before-extinction		3.93			122	-110.5	Changxing	Pre-extinction	3.6
123	-333.954	Changxing	Before-extinction	-28.0614	3.98	32		123	-113.5	Changxing	Pre-extinction	3.7
124	-341.9	Changxing	Before-extinction	-27.8636	3.74	31.6		124	-115	Changxing	Pre-extinction	3.4
125	-347.198	Changxing	Before-extinction	-27.4805	3.76	31.2		125	-116	Changxing	Pre-extinction	3.7
126	-353.555	Changxing	Before-extinction	-27.9625				126	-116.5	Changxing	Pre-extinction	3.8
127	-363.62	Changxing	Before-extinction	-27.9131	3.79	31.7		#: depth in original paper
128	-367.95	Changxing	Before-extinction		3.23
129	-373.685	Changxing	Before-extinction	-28.6669	3.46	32.1
130	-377.394	Changxing	Before-extinction	-27.9131	3.95	31.9
131	-383.751	Changxing	Before-extinction	-27.8513	3.58	31.4
132	-394.876	Changxing	Before-extinction	-28.5062	3.3	31.8
133	-396.995	Changxing	Before-extinction	-28.3209	3.32	31.6
134	-403.882	Changxing	Before-extinction	-28.1973	3.3	31.5
135	-414.477	Changxing	Before-extinction	-27.7524	3.18	30.9
136	-420.304	Changxing	Before-extinction	-27.6536	3.77	31.4
137	-424.012	Changxing	Before-extinction	-28.4444	3.53	32
138	-433.548	Changxing	Before-extinction	-28.222	3.32	31.5
139	-440.435	Changxing	Before-extinction	-28.9264	3.5	32.4
140	-443.084	Changxing	Before-extinction	-29.5937	4.07
141	-446.262	Changxing	Before-extinction	-29.4207	2.8	32.2
142	-446.262	Changxing	Before-extinction	-26.3066	3.69	30
143	-464.804	Changxing	Before-extinction	-28.1726	3.46	31.6
144	-465.863	Changxing	Before-extinction	-27.5423	3.7	31.2
145	-474.869	Changxing	Before-extinction	-27.8513	3.25	31.1
146	-480.696	Changxing	Before-extinction	-27.6659
147	-487.583	Changxing	Before-extinction	-28.4815	3.58	32.1
148	-513.012	Changxing	Before-extinction	-28.049	3.79	31.8
149	-524.136	Changxing	Before-extinction	-27.5176	3.56	31.1
150	-544.267	Changxing	Before-extinction	-29.0252	1.57	30.6
151	-576.053	Changxing	Before-extinction	-27.5423	3.62	31.2
152	-590.356	Changxing	Before-extinction	-27.6906	4.1	31.8
153	-603.6	Changxing	Before-extinction	-28.5804	3.08	31.7
154	-611.546	Changxing	Before-extinction	-27.53	3.6	31.1
155	-620.552	Changxing	Before-extinction	-28.0861	3.37	31.5
156	-627.439	Changxing	Before-extinction	-28.2591	3.84	32.1
157	-644.391	Changxing	Before-extinction	-28.6298	2.76	31.4
158	-660.814	Changxing	Before-extinction	-28.1726	3.77	31.9
159	-675.647	Changxing	Before-extinction	-27.9007	2.64	30.5
160	-680.945	Changxing	Before-extinction	-27.8266
161	-688.891	Changxing	Before-extinction	-27.6906	3.32	31
162	-703.724	Changxing	Before-extinction	-28.0984	3.29	31.4
163	-710.081	Changxing	Before-extinction	-28.6422	2.82	31.5
164	-723.855	Changxing	Before-extinction	-28.9511	3.18	32.1
165	-741.337	Changxing	Before-extinction	-29.0747	3.39	32.5
166	-754.051	Changxing	Before-extinction	-29.26	3.18	32.4
167	-802.789	Changxing	Before-extinction	-29.8532	3.22	33.1
168	-832.985	Changxing	Before-extinction	-29.6925
169	-848.878	Changxing	Before-extinction	-28.9387
#: depth in original paper
Xiakou section (Shen et al., 2012)						Xiakou section（Sun et al.，2019）
Sample	Depth#	Formation	Time Interval	δ13Ccarb		Sample	Depth#	Formation	Time Interval	δ13Ccarb	δ15N
No.	(m)			(‰,VPDB)		No.	(m)			(‰,VPDB)	vs air ( ‰)
1	4.43321	Daye	Post-extinction	0.725635		=position No.	2	Daye	Post-extinction	0.9	2.49
2	4.39308	Daye	Post-extinction	0.959193		=position No.	1.5	Daye	Post-extinction	1.63	2.21
3	4.34472	Daye	Post-extinction	0.867801		=position No.	1	Daye	Post-extinction	0.42	2.02
4	4.22332	Daye	Post-extinction	1.17244		=position No.	0.5	Daye	Post-extinction	0.72
5	4.15644	Daye	Post-extinction	0.959193		=position No.	0	Daye	Post-extinction	0.25	1.86
6	4.1194	Daye	Post-extinction	0.446382		XK-268	0.6	Daye	Post-extinction	0.87	2.78
7	4.08648	Daye	Post-extinction	0.964271		XK-265c	0.35	Daye	Post-extinction	-0.63	2.67
8	4.0515	Daye	Post-extinction	1.59386		XK-265b	0.3	Daye	Post-extinction	-0.06	2.6
9	4.01754	Daye	Post-extinction	1.54309		XK-263	-0.05	Daye	Post-extinction	0.65	1.95
10	3.94141	Daye	Post-extinction	1.7411		XK-262	-0.12	Daye	Post-extinction	0.23	2.88
11	3.89099	Daye	Post-extinction	2.28438		XK-259A	-0.28	Daye	Post-extinction		2.21
12	3.84058	Daye	Post-extinction	1.22321		XK-248A	-0.81	Daye	Post-extinction		1.36
13	3.69963	Daye	Post-extinction	1.65479		XK-248B	-0.88	Daye	Post-extinction		1.05
14	3.57102	Daye	Post-extinction	1.65987		XK-247A	-0.9	Dalong	Pre-extinction	1.56	1.53
15	3.51134	Daye	Post-extinction	1.51262		XK-247B	-0.95	Dalong	Pre-extinction		1.1
16	3.44755	Daye	Post-extinction	0.791641		XK-246	-1.04	Dalong	Pre-extinction	1.95	0.83
17	3.41977	Daye	Post-extinction	0.558083		XK-245	-1.16	Dalong	Pre-extinction	1.86	0.82
18	3.39508	Daye	Post-extinction	0.466691		XK-244A	-1.24	Dalong	Pre-extinction	2.03	1.21
19	3.37142	Daye	Post-extinction	0.390531		XK-243	-1.29	Dalong	Pre-extinction	2.16	0.58
20	3.2212	Daye	Post-extinction	1.43139		XK-242	-1.39	Dalong	Pre-extinction	2.06	0.55
21	3.07408	Daye	Post-extinction	1.54816		XK-241	-1.5	Dalong	Pre-extinction	1.93	0.72
22	3.03704	Daye	Post-extinction	0.766254		XK-240	-1.6	Dalong	Pre-extinction	2.32	1.27
23	2.97736	Daye	Post-extinction	0.319448		XK-239	-1.67	Dalong	Pre-extinction	2.31	0.87
24	2.95164	Daye	Post-extinction	1.08613		XK-237	-1.9	Dalong	Pre-extinction	2.14	1.04
25	2.91254	Daye	Post-extinction	1.17244		XK-231	-2.35	Dalong	Pre-extinction	1.52	1.31
26	2.86625	Daye	Post-extinction	0.624089		XK-230	-2.45	Dalong	Pre-extinction	2.06	0.67
27	2.82509	Daye	Post-extinction	0.446382		XK-229	-2.59	Dalong	Pre-extinction	1.15	0.84
28	2.76953	Daye	Post-extinction	0.0148077		XK-226	-2.95	Dalong	Pre-extinction	1.27	0.61
29	2.74793	Daye	Post-extinction	-0.0207336		XK-225	-3.12	Dalong	Pre-extinction	0.82	0.9
30	2.7078	Daye	Post-extinction	-0.472617		XK-224	-3.28	Dalong	Pre-extinction	1.22	0.11
31	2.59565	Dalong	Pre-extinction	1.3603		XK-223	-3.4	Dalong	Pre-extinction		-0.02
32	2.52672	Dalong	Pre-extinction	1.75634		#: depth in original paper
33	2.46293	Dalong	Pre-extinction	1.53293
34	2.44338	Dalong	Pre-extinction	1.12675
35	2.37959	Dalong	Pre-extinction	1.39077
36	2.33844	Dalong	Pre-extinction	2.17268
37	2.2695	Dalong	Pre-extinction	0.532697
38	2.13267	Dalong	Pre-extinction	1.41108
39	2.01332	Dalong	Pre-extinction	1.93404
40	1.76125	Dalong	Pre-extinction	2.28946
41	1.58975	Dalong	Pre-extinction	2.8448
42	1.51686	Dalong	Pre-extinction	2.20432
43	1.44752	Dalong	Pre-extinction	3.31857
44	1.35152	Dalong	Pre-extinction	2.178
45	1.25907	Dalong	Pre-extinction	2.11658
46	1.12928	Dalong	Pre-extinction	2.10781
47	1.02261	Dalong	Pre-extinction	2.28328
48	0.923051	Dalong	Pre-extinction	2.07271
49	0.832379	Dalong	Pre-extinction	2.42366
50	0.649258	Dalong	Pre-extinction	2.09904
51	0.501694	Dalong	Pre-extinction	0.765442
52	0.428801	Dalong	Pre-extinction	0.598743
53	0.382576	Dalong	Pre-extinction	1.38837
54	0.359464	Dalong	Pre-extinction	1.8446
55	0.331018	Dalong	Pre-extinction	0.835631
56	0.291904	Dalong	Pre-extinction	1.29186
57	0.130117	Dalong	Pre-extinction	0.405722
#: depth in original paper
Shangsi section（Xie et al.，2017）							Shangsi section（Luo et al.，2014）								Shangsi section（Xiang et al.，2016）
Sample	Depth#	Formation	Time Interval	δ13Ccarb	δ15N		No.	Depth #	Formation	Time Interval	δ13Corg	δ13Ccarb	δ13Ccarb-δ13Corg		Sample No.	Depth#	Formation	Time Interval	δ15Nkero
No.	(m)			(‰,VPDB)	vs air ( ‰)			(cm)			(‰,VPDB)	(‰,VPDB)	(‰,VPDB)			（m）			( ‰)
TS-34	399.66	Feixianguan Fm.	Post-extinction	-0.64	0.87		1	1265.7	Feixianguan Fm.	Post-extinction	-29.7	-0.4	29.3		1	106.35	Feixianguan Fm.	Post-extinction	0.8
TS-33-top	398.66	Feixianguan Fm.	Post-extinction	-1.52	0.68		2	1165.7	Feixianguan Fm.	Post-extinction	-30.4	-0.6	29.8		2	105.5	Feixianguan Fm.	Post-extinction	0.7
TS-32	395.78	Feixianguan Fm.	Post-extinction	-1.41	0.67		3	1065.7	Feixianguan Fm.	Post-extinction	-29.7	-0.7	29		3	105.2	Feixianguan Fm.	Post-extinction	0.4
TS-31-top	395.58	Feixianguan Fm.	Post-extinction	-1.64			4	965.7	Feixianguan Fm.	Post-extinction	-29.6	-0.6	29		4	104.9	Feixianguan Fm.	Post-extinction	1.3
Tgy-fxg-03	395.5	Feixianguan Fm.	Post-extinction	-1.42			5	865.7	Feixianguan Fm.	Post-extinction	-29.6	-1.5	28.1		5	104.5	Feixianguan Fm.	Post-extinction	0.6
Tgy-fxg-02	394.2	Feixianguan Fm.	Post-extinction	-1.86			6	577.7	Feixianguan Fm.	Post-extinction	-30.9	-1.4	29.5		6	104.1	Feixianguan Fm.	Post-extinction	1.1
TS-31-d	393.11	Feixianguan Fm.	Post-extinction	-1.77	2.33		7	557.7	Feixianguan Fm.	Post-extinction	-26.4	-1.6	24.8		7	103.7	Feixianguan Fm.	Post-extinction	0.6
TS-30-1	393.08	Feixianguan Fm.	Post-extinction	-1.82			8	310.7	Feixianguan Fm.	Post-extinction	-30.3	-1.8	28.5		8	103.2	Feixianguan Fm.	Post-extinction	0.5
TS-30-2	393.01	Feixianguan Fm.	Post-extinction	-1.78	0.84		9	307.7	Feixianguan Fm.	Post-extinction	-30.7	-1.8	28.9		9	102.8	Feixianguan Fm.	Post-extinction	-0.6
TS-30-3	392.91	Feixianguan Fm.	Post-extinction	-1.68			10	300.7	Feixianguan Fm.	Post-extinction	-30.9	-1.8	29.1		10	102.2	Feixianguan Fm.	Post-extinction	0.7
TS-30-4	392.85	Feixianguan Fm.	Post-extinction	-1.65			11	290.7	Feixianguan Fm.	Post-extinction	-30.3	-1.7	28.6		11	101.8	Feixianguan Fm.	Post-extinction	0.4
TS-30-5	392.78	Feixianguan Fm.	Post-extinction	-2.16	1.35		12	278.2	Feixianguan Fm.	Post-extinction	-30.2	-2.2	28		12	101.5	Feixianguan Fm.	Post-extinction	0.4
TS-30-6	392.85	Feixianguan Fm.	Post-extinction	-1.57			13	259.7	Feixianguan Fm.	Post-extinction	-27.4	-1.6	25.8		13	101	Feixianguan Fm.	Post-extinction	-0.2
TS-30-7	392.6	Feixianguan Fm.	Post-extinction	-1.6			14	240.7	Feixianguan Fm.	Post-extinction	-30.3	-0.8	29.5		14	100.7	Feixianguan Fm.	Post-extinction	-1.2
TS-30-8	392.53	Feixianguan Fm.	Post-extinction	-1.31	1.45		15	232.9	Feixianguan Fm.	Post-extinction	-30.6	-1.5	29.1		15	100	Dalong Fm.	Pre-extinction	2.1
TS-30-9	392.46	Feixianguan Fm.	Post-extinction	-0.85			16	204.9	Feixianguan Fm.	Post-extinction	-30.8				16	99.6	Dalong Fm.	Pre-extinction	1.6
Tgy-fxg-01	392.4	Feixianguan Fm.	Post-extinction	-2.41			17	187.5	Feixianguan Fm.	Post-extinction	-24.7	-2.8	21.9		17	99.2	Dalong Fm.	Pre-extinction	2.3
TS-30-10	392.41	Feixianguan Fm.	Post-extinction	-0.84			18	182	Feixianguan Fm.	Post-extinction	-24.4	-2.4	22		18	98.8	Dalong Fm.	Pre-extinction	2.5
TS-30-11	392.38	Feixianguan Fm.	Post-extinction	-1.71			19	177	Feixianguan Fm.	Post-extinction	-26.1	-3.2	22.9		19	98.3	Dalong Fm.	Pre-extinction	2.9
TS-30-12	392.33	Feixianguan Fm.	Post-extinction	-1.48			20	161.5	Feixianguan Fm.	Post-extinction	-25.6	-1.7	23.9		20	97.9	Dalong Fm.	Pre-extinction	1.7
TS-30-13	392.31	Feixianguan Fm.	Post-extinction	-1.23	1.69		21	150	Feixianguan Fm.	Post-extinction	-25.6	-2.2	23.4		21	97.5	Dalong Fm.	Pre-extinction	2.4
TS-30-14	392.29	Feixianguan Fm.	Post-extinction	-1.05			22	138	Feixianguan Fm.	Post-extinction	-26.5	-2.4	24.1		22	97	Dalong Fm.	Pre-extinction	2.5
TS-30-15	392.22	Feixianguan Fm.	Post-extinction	-0.95			23	127.5	Feixianguan Fm.	Post-extinction	-29.1	-4.1	25		23	96.6	Dalong Fm.	Pre-extinction	2.2
TS-30-16	392.2	Feixianguan Fm.	Post-extinction	-0.86			24	122	Feixianguan Fm.	Post-extinction	-26.7	-3.7	23		24	96	Dalong Fm.	Pre-extinction	1
TS-30-17	392.17	Feixianguan Fm.	Post-extinction	-0.85			25	111.5	Feixianguan Fm.	Post-extinction	-28	-3.8	24.2		25	95.8	Dalong Fm.	Pre-extinction	1.4
TS-30-18	392.15	Feixianguan Fm.	Post-extinction	-0.67	1.52		26	106	Feixianguan Fm.	Post-extinction	-30.9	-3.8	27.1		26	95.5	Dalong Fm.	Pre-extinction	1.5
TS-30-19	392.05	Feixianguan Fm.	Post-extinction				27	95.5	Feixianguan Fm.	Post-extinction	-25.3	-3	22.3		27	95.2	Dalong Fm.	Pre-extinction	1.7
TS-30-20	392.03	Feixianguan Fm.	Post-extinction	-0.74			28	64.5	Feixianguan Fm.	Post-extinction	-28.2	-2.8	25.4		28	94.8	Dalong Fm.	Pre-extinction	2.4
TS-30-21	391.98	Feixianguan Fm.	Post-extinction	-0.56			29	46.5	Feixianguan Fm.	Post-extinction	-28.2	-2.1	26.1		29	94.5	Dalong Fm.	Pre-extinction	2
TS-29-1	391.88	Feixianguan Fm.	Post-extinction	-2.84	1.79		30	26	Feixianguan Fm.	Post-extinction	-29.7	-1.9	27.8		30	94.1	Dalong Fm.	Pre-extinction	1.2
TS-29-2	391.82	Feixianguan Fm.	Post-extinction	-2.37			31	-2	Dalong Fm.	Pre-extinction	-26.2				31	93.8	Dalong Fm.	Pre-extinction	1.7
TS-29-3	391.77	Feixianguan Fm.	Post-extinction	-3.18			32	-9	Dalong Fm.	Pre-extinction	-25.2	-1.1	24.1		32	93.5	Dalong Fm.	Pre-extinction	2.2
TS-29-5	391.62	Feixianguan Fm.	Post-extinction	-1.67			33	-18.4	Dalong Fm.	Pre-extinction	-24.9				33	93	Dalong Fm.	Pre-extinction	2.3
TS-29-6	391.5	Feixianguan Fm.	Post-extinction	-2.16	2.36		34	-21.9	Dalong Fm.	Pre-extinction	-25				34	92.7	Dalong Fm.	Pre-extinction	2.3
TS-29-7	391.38	Feixianguan Fm.	Post-extinction	-2.4			35	-24.1	Dalong Fm.	Pre-extinction	-25.4				35	92.4	Dalong Fm.	Pre-extinction	1.5
TS-28c-2	391.22	Feixianguan Fm.	Post-extinction	-3.73			36	-29.8	Dalong Fm.	Pre-extinction	-26.2	-0.6	25.6		36	92	Dalong Fm.	Pre-extinction	2.2
TS-28b-4	391.12	Feixianguan Fm.	Post-extinction	-3.76	2.27		37	-35.3	Dalong Fm.	Pre-extinction	-26	-1.3	24.7		37	91.6	Dalong Fm.	Pre-extinction	1.4
TS-28b-5	391.06	Feixianguan Fm.	Post-extinction	-3.75			38	-42	Dalong Fm.	Pre-extinction	-25.6	-0.3	25.3		38	91.3	Dalong Fm.	Pre-extinction	1.4
TS-28b-6	391.06	Feixianguan Fm.	Post-extinction	-3.42			39	-47	Dalong Fm.	Pre-extinction	-25.4	-0.9	24.5		39	91	Dalong Fm.	Pre-extinction	2.1
TS-28b-7	390.96	Feixianguan Fm.	Post-extinction	-2.98			40	-60.5	Dalong Fm.	Pre-extinction	-26.8	1.6	28.4		40	90.7	Dalong Fm.	Pre-extinction	1.9
TS-28b-8	390.89	Feixianguan Fm.	Post-extinction	-2.49			41	-73	Dalong Fm.	Pre-extinction	-26.1	2.1	28.2		41	90.3	Dalong Fm.	Pre-extinction	2.5
TS-28b-9	390.81	Feixianguan Fm.	Post-extinction	-1.23	2.25		42	-210.5	Dalong Fm.	Pre-extinction	-26.1	3	29.1		42	90	Dalong Fm.	Pre-extinction	2.6
TS-28b-10	390.73	Feixianguan Fm.	Post-extinction	-1.55			43	-260.5	Dalong Fm.	Pre-extinction	-25.9	3	28.9		#: depth in original paper
TS-28b-11	390.65	Feixianguan Fm.	Post-extinction	-2.78			44	-310.5	Dalong Fm.	Pre-extinction	-26.8	2.9	29.7
TS-28b-12	390.57	Feixianguan Fm.	Post-extinction	-1.96			45	-360.5	Dalong Fm.	Pre-extinction	-25.5	2.7	28.2
TS-28b-13	390.51	Feixianguan Fm.	Post-extinction	-2.63	0.94		#: depth in original paper
TS-28b-14	390.47	Feixianguan Fm.	Post-extinction	-2.09
TS-28a-16	390.39	Feixianguan Fm.	Post-extinction	-1.98
TS-28a-17	390.33	Feixianguan Fm.	Post-extinction	-2.11
TS-28a-18	390.26	Feixianguan Fm.	Post-extinction	-1.88	0.53
TS-28a-19	390.18	Feixianguan Fm.	Post-extinction	-2.64
TS-28a-20	390.1	Feixianguan Fm.	Post-extinction	-2.38
TS-28a-21	390.05	Feixianguan Fm.	Post-extinction	-2.4	2.02
PS-26top	389.98	Feixianguan Fm.	Post-extinction	-1.06
PS-26	389.91	Feixianguan Fm.	Post-extinction	-1.47
PS-25e	389.82	Feixianguan Fm.	Post-extinction	-3.04	0.71
PS-25c	389.78	Feixianguan Fm.	Post-extinction		1.06
PS-25a	389.76	Feixianguan Fm.	Post-extinction		2.05
PS-24s-2	389.7	Dalong Fm.	Pre-extinction	-0.61
PS-24s-1	389.65	Dalong Fm.	Pre-extinction	-1.32
PS-24z-2	389.58	Dalong Fm.	Pre-extinction	-0.25
PS-24z-1	389.53	Dalong Fm.	Pre-extinction	-0.87
PS-24dz	389.48	Dalong Fm.	Pre-extinction	-0.51
PS-24b	389.4	Dalong Fm.	Pre-extinction	1.56	2.34
PS-24a	389.27	Dalong Fm.	Pre-extinction	2.1
PS-22-2	387.9	Dalong Fm.	Pre-extinction	2.97
PS-22-3	387.4	Dalong Fm.	Pre-extinction	2.99
PS-21-2	386.9	Dalong Fm.	Pre-extinction	2.85	1.77
PS-21-3	386.4	Dalong Fm.	Pre-extinction	2.66	1.9
PS-21-4	385.4	Dalong Fm.	Pre-extinction	2.54	2.17
Pgy-x-164-2	385.43	Dalong Fm.	Pre-extinction	3.08
Pgy-x-164-1	384.43	Dalong Fm.	Pre-extinction	2.99
Pgy-x-163-1	383.09	Dalong Fm.	Pre-extinction	2.31
#: depth in original paper
Chaotian section（Saitoh et al.，2014）									Chaotian section (Saitoh et al., 2021)										Chaotian section (Cao et al., 2010)
Sample	Depth#	Formation	Time Interval	δ13Corg	δ15N	TOC	TN (ppm)		Sample	Depth#	Formation	Time Interval	δ13Ccarb	δ18Ocarb	δ13Corg	δ13Ccarb-δ13Corg	TOC		Sample	Depth#	Formation	Time Interval	δ13Ccarb
No.	(m)			(‰,VPDB)	vs air ( ‰)	(%)			No.	(m)			(‰,VPDB)	(‰,VPDB)	(‰,VPDB)	(‰,VPDB)	(%)		No.	(m)			(‰,VPDB)
G8	40.3	Feixianguan	Post-extinction	-29.6	0.8	0.7	261		G8	38.3	Feixianguan	Post-extinction	-1.7	-5.5	-29.6	27.9	0		1	9.03273	Feixianguan	Post-extinction	-1.75128
G6	40	Feixianguan	Post-extinction	-31.3	-0.6	0.7	245		G6	38	Feixianguan	Post-extinction	-1.9	-6.1	-31.3	29.5	0		2	8.87166	Feixianguan	Post-extinction	-1.86617
G4	39.7	Feixianguan	Post-extinction	-31.4	0.1	0.7	657		G4	37.7	Feixianguan	Post-extinction	-1.8	-5.9	-31.4	29.7	0.1		3	8.47607	Feixianguan	Post-extinction	-1.2981
G1	39.3	Feixianguan	Post-extinction	-31.8	-0.4	1.5	1288		G1	37.3	Feixianguan	Post-extinction	-1.7	-5.7	-31.8	30	0.1		4	8.04938	Feixianguan	Post-extinction	-1.16406
F11	38.8	Feixianguan	Post-extinction	-31.6	-1	1.6	1225		F11	36.8	Feixianguan	Post-extinction	-1.8	-5.9	-31.6	29.9	0.1		5	7.74421	Feixianguan	Post-extinction	-0.353452
F7	38.5	Feixianguan	Post-extinction	-31.7	-1.4	2	3224		F7	36.5	Feixianguan	Post-extinction	-1.9	-4.9	-31.7	29.8	0.1		6	7.65379	Feixianguan	Post-extinction	-0.678973
F5	38.3	Feixianguan	Post-extinction	-28.2	-1.5	0.9	1639		F5	36.3	Feixianguan	Post-extinction	-1.6	-5.5	-28.2	26.7	0		7	7.45599	Feixianguan	Post-extinction	-0.270476
F3	38	Feixianguan	Post-extinction	-30.8	-0.8	0	13		F3	36	Feixianguan	Post-extinction	-1.3	-6	-30.8	29.5	0		8	7.35426	Feixianguan	Post-extinction	-0.238562
F1	37.7	Feixianguan	Post-extinction	-30.1	0.9	0.1	590		F1	35.7	Feixianguan	Post-extinction	-0.9	-6.9	-30.1	29.2	0.1		9	6.97844	Feixianguan	Post-extinction	-0.168352
E7	36.8	Feixianguan	Post-extinction	-25.6	-0.4	0.2	648		E11	35.1	Feixianguan	Post-extinction	-0.4	-5.8					10	6.71	Feixianguan	Post-extinction	-0.0151654
E2	36.4	Feixianguan	Post-extinction	-25	-0.2	0.1	1035		E7	34.8	Feixianguan	Post-extinction	-0.1	-4.4	-25.6	25.5	0.1		11	6.18725	Feixianguan	Post-extinction	0.980545
D19	35.7	Dalong	Pre-extinction	-28.2		0	32		E2	34.4	Feixianguan	Post-extinction	0.1	-4.4	-25	25	0.1		12	6.02901	Feixianguan	Post-extinction	0.801828
D15	35.3	Dalong	Pre-extinction	-25.6	-0.3	0.1	1401		D19	33.7	Dalong	Pre-extinction	1	-5.7	-28.2	29.2	0		13	5.94989	Feixianguan	Post-extinction	0.578431
D13	35.1	Dalong	Pre-extinction	-25.2	-0.7	0.1	1104		D15	33.3	Dalong	Pre-extinction	0.4	-7	-25.6	26	0.1		14	5.83969	Feixianguan	Post-extinction	0.686938
D9	34.8	Dalong	Pre-extinction	-25.2	-0.8	0.1	74		D13	33.1	Dalong	Pre-extinction	-1.3	-7.5	-25.2	23.8	0.2		15	5.68145	Feixianguan	Post-extinction	-0.161969
D3	34.2	Dalong	Pre-extinction	-25.7	0.5	0	22		D9	32.8	Dalong	Pre-extinction	0.6	-5.7	-25.2	25.8	0.1		16	5.56559	Feixianguan	Post-extinction	0.731618
C8	33.6	Dalong	Pre-extinction	-26	0.2	0	81		D3	32.2	Dalong	Pre-extinction	1.9	-4	-25.7	27.6	0		17	5.42713	Feixianguan	Post-extinction	0.240145
C6	33.2	Dalong	Pre-extinction	-26.7	-1.1	0.1	236		C8	31.6	Dalong	Pre-extinction	0.6	-7	-26	26.6	0.9		18	5.22933	Feixianguan	Post-extinction	0.648642
B33	32.3	Dalong	Pre-extinction	-27.1	-0.2	0.1	42		C6	31.2	Dalong	Pre-extinction	-0.2	-7.2	-26.7	26.4	2		19	4.95242	Feixianguan	Post-extinction	1.02522
B26	31.7	Dalong	Pre-extinction	-27.2	-0.1	0.1	90		B33	30.3	Dalong	Pre-extinction	0.2	-7.1	-27.1	27.3	1.6		20	4.68397	Feixianguan	Post-extinction	2.44858
B20	31.2	Dalong	Pre-extinction	-26	-0.5	0.1	49		B26	29.7	Dalong	Pre-extinction	0.3	-7.1	-27.2	27.4	1.5		21	4.37032	Feixianguan	Post-extinction	1.255
B10	30.5	Dalong	Pre-extinction	-27.2	0.6	0	26		B20	29.2	Dalong	Pre-extinction	0.7	-6.7	-26	26.7	0.7		22	4.14709	Feixianguan	Post-extinction	0.329504
B3	30	Dalong	Pre-extinction	-26.5	0.8	0	48		B10	28.5	Dalong	Pre-extinction	-3.4	-6	-27.2	23.8	0.7		23	4.09905	Dalong	Pre-extinction	-0.640676
A11	29.4	Dalong	Pre-extinction	-26.6	-0.3				B3	28	Dalong	Pre-extinction	-5.9	-6	-26.5	20.6	0.7		24	3.52826	Dalong	Pre-extinction	0.0103656
#: depth in original paper									A11	27.4	Dalong	Pre-extinction			-26.6		4.8		25	3.25699	Dalong	Pre-extinction	0.1827
									#: depth in original paper										26	2.94334	Dalong	Pre-extinction	-0.653442
																			27	2.56752	Dalong	Pre-extinction	-0.564083
																			28	2.37538	Dalong	Pre-extinction	-0.825776
																			29	2.17192	Dalong	Pre-extinction	-0.666207
																			30	1.71416	Dalong	Pre-extinction	0.635876
																			31	1.38073	Dalong	Pre-extinction	0.795445
																			32	0.982304	Dalong	Pre-extinction	0.374183
																			33	0.78168	Dalong	Pre-extinction	-0.206648
																			34	0.0724284	Dalong	Pre-extinction	0.738
																			#: depth in original paper
